1 **SARS-CoV-2 Omicron boosting induces de novo B cell response in humans**

2 Wafaa B. Alsoussi<sup>1,11</sup>, Sameer K. Malladi<sup>1,11</sup>, Julian Q. Zhou<sup>1,12</sup>, Zhuoming Liu<sup>2,12</sup>, Baoling  
3 Ying<sup>1,2,12</sup>, Wooseob Kim<sup>1</sup>, Aaron J. Schmitz<sup>1</sup>, Tingting Lei<sup>1</sup>, Stephen C. Horvath<sup>1</sup>, Alexandria J.  
4 Sturtz<sup>1</sup>, Katherine M. McIntire<sup>1</sup>, Birk Evavold<sup>1</sup>, Fangjie Han<sup>3</sup>, Suzanne M. Scheaffer<sup>1,2</sup>, Isabella  
5 F. Fox<sup>1</sup>, Luis Parra-Rodriguez<sup>4</sup>, Raffael Nachbagauer<sup>5</sup>, Biliana Nestorova<sup>5</sup>, Spyros Chalkias<sup>5</sup>,  
6 Christopher W. Farnsworth<sup>1</sup>, Michael K. Klebert<sup>6</sup>, Iskra Pusic<sup>7</sup>, Benjamin S. Strnad<sup>8</sup>, William D.  
7 Middleton<sup>8</sup>, Sharlene A. Teefey<sup>8</sup>, Sean P.J. Whelan<sup>2</sup>, Michael S. Diamond<sup>1,2,4,9,10</sup>, Robert Paris<sup>5</sup>,  
8 Jane A. O'Halloran<sup>4,6</sup>, Rachel M. Presti<sup>4,6,10,9</sup>, Jackson S. Turner<sup>1\*</sup>, Ali H. Ellebedy<sup>1,9,10\*</sup>

9

10 <sup>1</sup>Department of Pathology and Immunology, Washington University School of Medicine; St.  
11 Louis, MO, USA.

12 <sup>2</sup>Department of Molecular Microbiology, Washington University School of Medicine; St. Louis,  
13 MO, USA.

14 <sup>3</sup>Department of Emergency Medicine, Washington University School of Medicine; St. Louis,  
15 MO, USA.

16 <sup>4</sup>Division of Infectious Diseases, Department of Internal Medicine, Washington University  
17 School of Medicine; St. Louis, MO, USA.

18 <sup>5</sup>Moderna, Inc.; Cambridge, MA, USA.

19 <sup>6</sup>Infectious Disease Clinical Research Unit, Washington University School of Medicine; St.  
20 Louis, MO, USA.

21 <sup>7</sup>Division of Oncology, Department of Medicine, Washington University School of Medicine; St.  
22 Louis, MO, USA.

23 <sup>8</sup>Mallinckrodt Institute of Radiology, Washington University School of Medicine; St. Louis,  
24 MO, USA.

25 <sup>9</sup>Center for Vaccines and Immunity to Microbial Pathogens, Washington University School of  
26 Medicine; St. Louis, MO, USA.

27 <sup>10</sup>The Andrew M. and Jane M. Bursky Center for Human Immunology & Immunotherapy  
28 Programs, Washington University School of Medicine; St. Louis, MO, USA.

29 <sup>11,12</sup>These authors contributed equally to this work

30 \*Correspondence: [ellebedy@wustl.edu](mailto:ellebedy@wustl.edu); [turner.j@wustl.edu](mailto:turner.j@wustl.edu)

31 **Abstract**

32 The primary two-dose SARS-CoV-2 mRNA vaccine series are strongly immunogenic in  
33 humans, but the emergence of highly infectious variants necessitated additional doses of these  
34 vaccines and the development of new variant-derived ones<sup>1-4</sup>. SARS-CoV-2 booster  
35 immunizations in humans primarily recruit pre-existing memory B cells (MBCs)<sup>5-9</sup>. It remains  
36 unclear, however, whether the additional doses induce germinal centre (GC) reactions where  
37 reengaged B cells can further mature and whether variant-derived vaccines can elicit responses  
38 to novel epitopes specific to such variants. Here, we show that boosting with the original SARS-  
39 CoV-2 spike vaccine (mRNA-1273) or a B.1.351/B.1.617.2 (Beta/Delta) bivalent vaccine  
40 (mRNA-1273.213) induces robust spike-specific GC B cell responses in humans. The GC  
41 response persisted for at least eight weeks, leading to significantly more mutated antigen-specific  
42 MBC and bone marrow plasma cell compartments. Interrogation of MBC-derived spike-binding  
43 monoclonal antibodies (mAbs) isolated from individuals boosted with either mRNA-1273,  
44 mRNA-1273.213, or a monovalent Omicron BA.1-based vaccine (mRNA-1273.529) revealed a  
45 striking imprinting effect by the primary vaccination series, with all mAbs (n=769) recognizing  
46 the original SARS-CoV-2 spike protein. Nonetheless, using a more targeted approach, we  
47 isolated mAbs that recognized the spike protein of the SARS-CoV-2 Omicron (BA.1) but not the  
48 original SARS-CoV-2 spike from the mRNA-1273.529 boosted individuals. The latter mAbs  
49 were less mutated and recognized novel epitopes within the spike protein, suggesting a naïve B  
50 cell origin. Thus, SARS-CoV-2 boosting in humans induce robust GC B cell responses, and  
51 immunization with an antigenically distant spike can overcome the antigenic imprinting by the  
52 primary vaccination series.

## 53 Main Text

54 The emergence of SARS-CoV-2 variants with increasing numbers of mutations in the  
55 spike protein (S) has decreased the effectiveness of primary series vaccinations and led to a  
56 recommendation for booster immunizations in most populations<sup>10-16</sup>. Multiple reports  
57 documented that booster immunizations based on the original Washington strain (WA1/2020)  
58 enhanced antibody responses to the ancestral strain as well as emerging variants of concern<sup>5-8,17-</sup>  
59 <sup>19</sup>. In addition, new vaccines based on circulating variants were made to enhance the ability of  
60 induced antibodies to combat such variants. Indeed, recent evidence indicates that a B.1.351  
61 (Beta)-containing booster can generate higher titers of neutralizing antibodies against both  
62 B.1.351 and B.1.1.529 (Omicron) BA.1 strains of SARS-CoV-2 compared to a booster based on  
63 the original strain alone and bivalent boosters encoding the original strain and either the BA.1 or  
64 BA.5 strain induced broader neutralizing antibody responses than the constituent monovalent  
65 vaccines<sup>20,21</sup>. Whether re-exposure to mRNA vaccines encoding S from the original SARS-CoV-  
66 2 strain or variants of concern induce robust germinal center (GC) reactions that are critical for  
67 refining high-affinity and durable antibody responses has not been examined in humans. To  
68 address these questions, we conducted an immunization study of 46 healthy adults with no  
69 history of SARS-CoV-2 infection, all of whom completed a primary vaccination course with  
70 either the Pfizer-BioNTech (BNT162b2) or Moderna (mRNA-1273) SARS-CoV-2 mRNA  
71 vaccines. Recruited individuals received a booster dose of 50 µg mRNA-1273, or mRNA-  
72 1273.213, which contains a total of 100 µg of mRNA encoding B.1.351 and B.1.617.2 (Delta)  
73 SARS-CoV-2 S proteins (**Extended Data Table 1, 2**), as a sub-study of an ongoing clinical trial  
74 (NCT04927065).

75           Seven of the participants received a booster immunization of mRNA-1273, and thirty-  
76   nine received mRNA-1273.213. Blood samples were collected at baseline and weeks 1, 2, 4, 8,  
77   17, and 26 after vaccination. Five and twenty participants in the mRNA-1273 and mRNA-  
78   1273.213 cohorts, respectively consented to collection of fine needle aspirates (FNAs) of  
79   draining axillary lymph nodes (LNs) at weeks 2 and 8. Three and eleven participants in the  
80   mRNA-1273 and mRNA-1273.213 cohorts, respectively consented to collection of bone marrow  
81   aspirates 26 weeks after their third dose (**Fig. 1a**). Circulating S-specific antibody-producing  
82   plasmablasts (PBs) were measured by enzyme-linked immune absorbent spot (ELISpot) assay.  
83   S-specific IgG- and IgA-producing PBs were detected one week after the booster immunization  
84   from all participants in the mRNA-1273 cohort. Robust circulating IgG-producing PB responses  
85   against the original WA1/2020 strain S as well as the vaccine-encoded B.1.351 and B.1.617.2 S  
86   proteins were detected in all participants in the mRNA-1273.213 cohort 1 week after  
87   immunization, with lower IgA responses detectable in most participants (**Fig. 1b, Extended**  
88   **Data Fig. 1a**). Plasma IgG antibody titers against S from the WA1/2020, B.1.351, B.1.617.2, and  
89   BA.1 strains were measured by multiplex bead binding assay. In both cohorts, plasma antibody  
90   binding levels increased against all strains 4 weeks after immunization and declined slightly by  
91   17 weeks (**Extended Data Fig. 1b**).

92           Ultrasonography was used to identify and guide FNA of accessible axillary nodes on the  
93   side of immunization 2 and 8 weeks post-boost. FNA samples were stained with pooled  
94   fluorescently labeled S probes from the WA1/2020, B.1.351, B.1.617.2, and BA.1 strains to  
95   detect S-specific B cells and analyzed by flow cytometry. We included BA.1 probes in the pool  
96   to detect MBCs that may have stochastically mutated to better recognize the variant antigen<sup>22</sup>. S-  
97   binding GC B cells, defined as CD19<sup>+</sup> CD3<sup>-</sup> IgD<sup>lo</sup> Bcl6<sup>+</sup> CD38<sup>int</sup> lymphocytes, and T follicular

98 helper cells (Tfh), defined as CD3<sup>+</sup> CD19<sup>-</sup> CD4<sup>+</sup> CD8<sup>-</sup> CD14<sup>-</sup> CXCR5<sup>+</sup> PD-1<sup>+</sup> BCL6<sup>+</sup> FoxP3<sup>-</sup>  
99 lymphocytes, were detected in FNAs from all participants analysed at week 2. Frequencies of S<sup>+</sup>  
100 GC B cells and Tfh correlated significantly and remained readily detectable in all but one  
101 participant from each cohort at week 8, consistent with the robust GC response observed after  
102 primary vaccination with SARS-CoV-2 mRNA vaccines (**Fig. 1c, Extended Data Fig. 1c–**  
103 **e**)<sup>2,23,24</sup>. Circulating MBCs in blood were identified as CD19<sup>+</sup> CD3<sup>-</sup> IgD<sup>lo</sup> CD20<sup>+</sup> lymphocytes  
104 that bound the pooled fluorescently labeled S probes. S<sup>+</sup> MBCs were detected in all participants  
105 prior to boosting and at similar frequencies 17 weeks post-boost, with median frequencies of  
106 0.52% and 0.55% of total circulating B cells in the mRNA-1273 cohort and 0.42% and 0.49% in  
107 the mRNA-1273.213 cohort (**Fig. 1d**). Consistent with sustained plasma antibody titers, bone  
108 marrow plasma cells (BMPCs) producing IgG that bound WA1/2020, B.1.351, B.1.617.2, and  
109 BA.1 S were detected in all thirteen participants with enough BMPCs for ELISpot (3 from the  
110 mRNA-1273 and 10 from the mRNA-1273.213 cohort). Frequencies of WA1/2020, B.1.351, and  
111 B.1.617.2-binding BMPCs were approximately two-fold lower than those of seasonal influenza  
112 vaccine-specific BMPCs, which accumulate over a lifetime of repeated antigen exposures.  
113 Frequencies of BA.1-binding BMPCs were approximately four-fold lower than those binding the  
114 other strains. S-binding IgA-producing BMPCs were considerably rarer or undetectable (**Fig. 1e,**  
115 **f, Extended Data Fig. 1f, g**).

116 To characterize the breadth of the MBC repertoire after boosting, we selected three  
117 participants from each cohort for whom we had characterized the B cell response to the primary  
118 vaccination series, 382-02, 382-07, and 382-08 in the mRNA-1273 cohort and 382-01, 382-13,  
119 and 382-15 in the mRNA-1273.213 cohort<sup>2,24</sup>. For both cohorts, we stained week 17 post-boost  
120 PBMCs with pooled fluorescently labeled S probes from the WA1/2020, B.1.351, B.1.617.2, and

121 BA.1 strains, allowing us to sort MBCs for mAb generation regardless of the S probe they  
122 bound. We also bulk-sorted week 17 total MBCs for heavy chain Ig sequencing to broaden the  
123 clonal repertoire analyses (**Extended Data Fig. 2a**). We generated 82, 59, 74, 94, 91, and 59  
124 clonally distinct antigen-specific mAbs from participants 382-02, 382-07, 382-08, 382-01, 382-  
125 13, and 382-15, respectively. We next assessed their binding to S from the WA1/2020, 1.351,  
126 1.617.2, and BA.1 strains by multiplex bead binding assay. Confirmatory ELISAs were  
127 performed for mAbs that did not bind in the multiplex assay. Remarkably, 203 of 215 mAbs  
128 (94%) and 224 of 244 mAbs (92%) derived from the MBCs from the mRNA-1273 and mRNA-  
129 1273.213 cohorts respectively, recognized the original WA1/2020 SARS-CoV-2 S as well as  
130 B.1.351, B.1.617.2, and BA.1 S proteins (**Fig. 1g–j, Extended Data Fig. 2b**).

131 To track the clonal dynamics of the B cell response in both cohorts, we performed single-  
132 cell RNA sequencing (scRNA-seq) on week 1 sorted PB and week 2 and 8 FNA specimens from  
133 the same six participants (**Fig. 2a, e, Extended Data Fig. 3a–g**). We then linked the B cell  
134 receptor sequences to known S-specific clones identified from either week 17 MBC-derived  
135 mAbs or the previously characterized response to the primary vaccination series (**Fig. 2b, e,**  
136 **Extended Data Fig. 3h**)<sup>2,24</sup>. The majority of S-specific PBs identified after boosting by scRNA-  
137 seq were clonally related to MBCs, GC B cells, and/or plasma cells induced by primary  
138 vaccination (**Fig. 2c**). Multiple S-specific clones were detected in the PB response after both the  
139 2<sup>nd</sup> dose of the primary vaccination series and the booster. Representatives of these clones  
140 participating in the booster PB response had significantly higher somatic hypermutation (SHM)  
141 frequencies in their immunoglobulin heavy chain variable region (IGHV) genes than those from  
142 the primary response, consistent with their recall from affinity-matured MBCs (**Fig. 2d**). S-  
143 specific PB clones identified one week post-boost were identified in GC responses in all 6

144 participants analyzed, though peak frequencies of the S-specific GC clonal repertoire occupied  
145 by PB clones varied widely among participants from 17% to 100% (**Extended Data Fig. 3i, j**).  
146 SHM frequencies among S-specific MBCs 17 weeks after boost were significantly higher than  
147 their clonally related counterparts isolated 6 months after primary vaccination, consistent with  
148 additional rounds of GC-driven maturation. Similar trends were observed among paired S-  
149 specific BMPC clones analyzed 6 or 9 months after primary immunization and 6 months after  
150 boost. However, SHM did not increase in all clonal families, consistent with durable populations  
151 of MBCs and BMPCs generated by the primary vaccine response persisting through the booster  
152 response (**Fig. 2f, g**). Both mRNA-1273 and mRNA-1273.213 elicited robust GC responses and  
153 maturation of the MBC and BMPC responses, but remarkably no antibodies were isolated that  
154 specifically targeted the variant strains encoded by the mRNA-1273.213 vaccine and did not  
155 cross-react to the original WA1/2020 S protein. Even among GC B cells and MBC from FNA 8  
156 weeks after vaccination, where S-binding cells are much more frequent than in PBMC,  
157 frequencies of cells that bound the B.1.351 and B.1.617.2 strains S but not WA1/2020 were too  
158 low to sort for analysis (**Extended Data Fig. 3k, l**). Thus, the B cell response after boosting with  
159 the mRNA1273.213 vaccine was dominantly imprinted by the primary vaccination series with  
160 mRNA-1273 encoding the ancestral spike.

161 To determine whether a more antigenically divergent booster could generate a detectable  
162 response targeting novel epitopes, we recruited 8 participants who had received a two-dose  
163 mRNA primary vaccination series and had no history of SARS-CoV-2 infection to receive 50 µg  
164 mRNA-1273.529, which encodes BA.1 S protein as a first or second booster after mRNA-1273  
165 (**Extended Data Tables 1, 2**). We analysed peripheral blood samples 1 and 17 weeks post-boost  
166 with mRNA-1273.529. All 7 participants analysed at 1 week had robust circulating IgG-

167 producing PB responses against the original WA1/2020 strain S as well as the vaccine-encoded  
168 BA.1 S protein, with lower IgA responses detectable in most participants (**Fig. 3a, Extended**  
169 **Data Fig. 4a**). To analyse the breadth of the MBC repertoire, we sorted MBCs from week 17  
170 post-boost PBMCs from participants 382-53, 382-54, and 382-55 (all of whom received mRNA-  
171 1273.529 as a first boost) using the same pooled fluorescent S probes from the WA1/2020,  
172 B.1.351, B.1.617.2, and BA.1 strains to detect MBCs regardless of their specificity and to  
173 maintain consistency with the previously generated mAbs. Like the mAbs from the mRNA-1273  
174 and mRNA-1273.213 cohorts, 308 out of 310 mAbs (99%) were cross-reactive, binding S from  
175 WA1/2020, B.1.351, B.1.617.2, and BA.1 (**Fig. 3b, c**). To assess the neutralization capacity of  
176 the MBC-derived mAbs, we first screened all 769 mAbs from all three cohorts with a high-  
177 throughput assay employing chimeric vesicular stomatitis virus (VSV) in which the native  
178 envelope glycoprotein was replaced with S from the WA1/2020 strain with substitution  
179 D614G<sup>25</sup>. Thirty, 49, and 52 mAbs from the mRNA-1273, mRNA-1273.213, and mRNA-  
180 1273.529 cohorts, respectively neutralized infection by at least 80% at 5 µg/mL (**Extended Data**  
181 **Fig. 4b**). We then evaluated the neutralizing capacity of these 131 mAbs against a panel of  
182 authentic, infectious SARS-CoV-2 variants, including WA1/2020 D614G, B.1.351, B.1.617.2,  
183 BA.1, and BA.5, against which 67%, 47%, 67%, 10%, and 10% from the mRNA-1273 cohort,  
184 76%, 51%, 76%, 20%, and 24% from the mRNA-1273.213 cohort, and 77%, 65%, 71%, 33%,  
185 and 23% from the mRNA-1273.529 cohort, respectively reduced infection by at least 90% at 5  
186 µg/mL (**Fig. 3d**).

187         Given the high frequency of cross-reactive mAbs, we took a more targeted approach to  
188 sort MBCs from participants specific for BA.1 that did not bind WA1/2020/382-53, 382-54, and  
189 382-55 (**Fig. 4a**). Remarkably, 57 of the 78 mAbs (73%) isolated using this approach still cross-



190 reacted with WA1/2020, indicating that the S-dependent sorting approach is not ideally sensitive  
191 for detecting low-affinity clones. Eight of the mAbs did not bind any of the antigens above  
192 background, 1 bound BA.1 only, and the remaining 12 bound BA.1 and B.1.351 and/or  
193 B.1.617.2 (**Fig. 4b, c**). We tested the neutralizing capacity of the 13 mAbs that bound BA.1 but  
194 not WA1/2020 against the panel of SARS-CoV-2 variants. As expected, none of the 13  
195 neutralized the ancestral D614G strain. Seven of the 13 (54%) neutralized BA.1, one neutralized  
196 BA.5 (8%), and none neutralized B.1.351 or B.1.617.2 at 5 µg/mL (**Fig. 4d**). All 7 of the BA.1-  
197 neutralizing mAbs were from participants 382-54 and 382-55. We compared the SHM frequency  
198 among the clonal families of these mAbs to those from the same participants that neutralized  
199 D614G and found that the former had significantly lower levels of SHM (**Fig. 4e**). All 7 of the  
200 BA.1-neutralizing mAbs targeted the receptor binding domain (RBD) of S (**Extended Data Fig.**  
201 **4c**). To define the amino acid residues targeted by the 6 most potently neutralizing BA.1-specific  
202 mAbs, we used VSV-SARS-CoV-2-S chimeric viruses (S from BA.1 strain) to select variants  
203 that escape neutralization as previously described<sup>26,27</sup>. We performed plaque assays on Vero cells  
204 with the 6 neutralizing mAbs in the overlay, purified the neutralization-resistant plaques, and  
205 sequenced the S genes (**Fig. 4f, Extended Data Fig. 4d**). Sequence analysis identified S escape  
206 mutations at residue R498 for mAbs 382-54 3B02, 382-55 1A11, and 382-55 1C04; residues  
207 R498 and H505 for mAb 382-55 1A05; residues L371, A372, F374, F375, and K378 for mAb  
208 382-55 2B01; and residue A484 for mAb 382-55 3A07. Notably, many of the mutations were  
209 reversions to the ancestral strain of SARS-CoV-2. (**Fig. 4g**).

210 This study evaluated antigen-specific B cell responses to SARS-CoV-2 mRNA-based  
211 booster (third or fourth) immunizations in humans. We show that boosting with an original  
212 SARS-CoV-2 S or bivalent B.1.351/B.1.617.2-matched vaccines induce robust S-specific GC

213 response in draining axillary LNs of all sampled participants that lasted at least eight weeks after  
214 vaccination. Spike-specific PBs and GC B cells predominantly originate from pre-existing clonal  
215 lineages, which is consistent with the fact that most MBC-derived mAbs we isolated recognized  
216 the original SARS-CoV-2 S protein. We also demonstrate that immunization with the  
217 monovalent B.1.1.529-matched vaccine can induce *de novo* B cell responses against novel  
218 epitopes in the B.1.1.529 S protein. These observations expand the large body of data showing  
219 improved potency and breadth of serum antibody responses after SARS-CoV-2 booster  
220 immunization in humans<sup>5-9,18</sup>.

221         Several critical insights relevant to cellular immunity to SARS-CoV-2 and recall  
222 responses to vaccination can be drawn from this study. B cell clones comprising the plasmablast  
223 compartment induced after the booster immunization were significantly more mutated than the  
224 same clones detected one week after completion of the primary vaccination series, a clear  
225 manifestation of the robust maturation process triggered by the primary vaccination<sup>2,24</sup>.  
226 Consistent with our previous work on B cell responses to seasonal influenza virus vaccination in  
227 humans<sup>29,30</sup>, the data presented here show that pre-existing MBCs can be efficiently re-engaged  
228 into recall GC reactions. The frequencies of IgG-secreting BMPCs specific to the original SARS-  
229 CoV-2 S protein observed in this study are several fold higher than those measured seven months  
230 after mild SARS-CoV-2 infections or six months after the primary mRNA vaccination series<sup>2,24</sup>.  
231 These increased frequencies are likely the result of the persistent GC responses induced after the  
232 primary vaccination series and the new GC reactions seeded by the booster immunization,  
233 highlighting the critical contribution of repeated antigen exposures to increasing antigen-specific  
234 BMPC frequency<sup>30,31</sup>.

235 An important and surprising finding in our study is the exceptionally high percentage of  
236 circulating MBCs that recognize the S protein from the original SARS-CoV-2 strain in the  
237 individuals boosted with variant antigens, particularly as these boosters did not encode the  
238 original strain S protein. It is important to note that none of the participants from whom the  
239 mAbs were derived had documented SARS-CoV-2 infection or seroconverted against the virus  
240 nucleocapsid protein for the duration of the study. These data are consistent with MBCs  
241 generated by the primary vaccination series dominating the recall response induced by the  
242 booster and potentially out-competing clones specific for novel epitopes. It is possible that we  
243 could not detect more naïve B cell-derived mAbs specific for novel epitopes on the B.1.351,  
244 B.1.617.2, or B.1.1.529 S proteins because their affinity for the probes was below the limit of  
245 detection. The high antigenic similarity between the variant-derived S antigens and that of the  
246 original SARS-CoV-2 strain in the case of the bivalent B.1.351/B.1.617.2 vaccine may have  
247 contributed to the low frequency of *de novo* clones recognizing the former. We also speculate  
248 that an additional immunization with a variant-based vaccine may be needed to amplify the  
249 exclusively variant-specific B cell clones, similar to what has been observed upon H5N1  
250 influenza virus immunization in humans<sup>32</sup>. Importantly, we note that many of the mutations  
251 selected when we cultured recombinant vesicular stomatitis virus expressing SARS-CoV-2  
252 Omicron (BA.1) S in the presence of the *de novo* mAbs were reverted to the residues in the  
253 original strain. This suggests that newly escaped viruses are likely sensitive to potently  
254 neutralizing antibodies, including some clinically approved therapeutic ones, that were thought  
255 to be no longer useful because of the changes at the E484 residue, for example<sup>34–38</sup>.

256 The high prevalence of MBCs recognizing the original SARS-CoV-2 S protein is  
257 evidence of antigenic imprinting, in which B cell responses to previously encountered antigens

258 remain dominant even after exposure to different but antigenically related antigens<sup>38,39</sup>. The  
259 current study provides direct evidence that immunization with a SARS-CoV-2 S antigen that is  
260 sufficiently distant antigenically from the original strain can engage naïve B cells that target  
261 novel epitopes on the immunizing antigen and thus overcome such imprinting.

## 262 **References**

- 263 1. Krause, P. R. *et al.* SARS-CoV-2 Variants and Vaccines. *N. Engl. J. Med.* **385**, 179–186 (2021).
- 264 2. Turner, J. S. *et al.* SARS-CoV-2 mRNA vaccines induce persistent human germinal centre responses. *Nature*  
265 **596**, 109–113 (2021).
- 266 3. Laidlaw, B. J. & Ellebedy, A. H. The germinal centre B cell response to SARS-CoV-2. *Nat. Rev. Immunol.* **22**,  
267 7–18 (2022).
- 268 4. Amanat, F. *et al.* SARS-CoV-2 mRNA vaccination induces functionally diverse antibodies to NTD, RBD and  
269 S2. *Cell* S0092867421007066 (2021) doi:10.1016/j.cell.2021.06.005.
- 270 5. Muecksch, F. *et al.* Increased memory B cell potency and breadth after a SARS-CoV-2 mRNA boost. *Nature*  
271 **607**, 128–134 (2022).
- 272 6. Goel, R. R. *et al.* Efficient recall of Omicron-reactive B cell memory after a third dose of SARS-CoV-2 mRNA  
273 vaccine. *Cell* **185**, 1875-1887.e8 (2022).
- 274 7. Rodda, L. B. *et al.* Imprinted SARS-CoV-2-specific memory lymphocytes define hybrid immunity. *Cell* **185**,  
275 1588-1601.e14 (2022).
- 276 8. Pérez-Then, E. *et al.* Neutralizing antibodies against the SARS-CoV-2 Delta and Omicron variants following  
277 heterologous CoronaVac plus BNT162b2 booster vaccination. *Nat. Med.* **28**, 481–485 (2022).
- 278 9. Sette, A. & Crotty, S. Immunological memory to SARS-CoV-2 infection and COVID-19 vaccines. *Immunol.*  
279 *Rev. imr.13089* (2022) doi:10.1111/imr.13089.
- 280 10. Lucas, C. *et al.* Impact of circulating SARS-CoV-2 variants on mRNA vaccine-induced immunity. *Nature* **600**,  
281 523–529 (2021).
- 282 11. Wang, Z. *et al.* mRNA vaccine-elicited antibodies to SARS-CoV-2 and circulating variants. *Nature* (2021)  
283 doi:10.1038/s41586-021-03324-6.
- 284 12. Andrews, N. *et al.* Covid-19 Vaccine Effectiveness against the Omicron (B.1.1.529) Variant. *N. Engl. J. Med.*  
285 **386**, 1532–1546 (2022).
- 286 13. Kuhlmann, C. *et al.* Breakthrough infections with SARS-CoV-2 omicron despite mRNA vaccine booster dose.  
287 *The Lancet* **399**, 625–626 (2022).
- 288 14. Schmidt, F. *et al.* Plasma neutralization of the SARS-CoV-2 omicron variant. *N. Engl. J. Med.* **386**, 599–601  
289 (2022).

- 290 15. Cameroni, E. *et al.* Broadly neutralizing antibodies overcome SARS-CoV-2 Omicron antigenic shift. *Nature*  
291 **602**, 664–670 (2022).
- 292 16. Cele, S. *et al.* Omicron extensively but incompletely escapes Pfizer BNT162b2 neutralization. *Nature* **602**,  
293 654–656 (2022).
- 294 17. Falsey, A. R. *et al.* SARS-CoV-2 Neutralization with BNT162b2 Vaccine Dose 3. *N. Engl. J. Med.* **385**, 1627–  
295 1629 (2021).
- 296 18. Bowen, J. E. *et al.* Omicron spike function and neutralizing activity elicited by a comprehensive panel of  
297 vaccines. *Science* eabq0203 (2022) doi:10.1126/science.abq0203.
- 298 19. Muik, A. *et al.* Neutralization of SARS-CoV-2 Omicron by BNT162b2 mRNA vaccine–elicited human sera.  
299 *Science* **375**, 678–680 (2022).
- 300 20. Chalkias, S. *et al.* *Safety, Immunogenicity and Antibody Persistence of a Bivalent Beta-Containing Booster*  
301 *Vaccine*. <https://www.researchsquare.com/article/rs-1555201/v1> (2022) doi:10.21203/rs.3.rs-1555201/v1.
- 302 21. Scheaffer, S. M. *et al.* *Bivalent SARS-CoV-2 mRNA vaccines increase breadth of neutralization and protect*  
303 *against the BA.5 Omicron variant*. <http://biorxiv.org/lookup/doi/10.1101/2022.09.12.507614> (2022)  
304 doi:10.1101/2022.09.12.507614.
- 305 22. Purtha, W. E., Tedder, T. F., Johnson, S., Bhattacharya, D. & Diamond, M. S. Memory B cells, but not long-  
306 lived plasma cells, possess antigen specificities for viral escape mutants. *J. Exp. Med.* **208**, 2599–2606 (2011).
- 307 23. Lederer, K. *et al.* Germinal center responses to SARS-CoV-2 mRNA vaccines in healthy and  
308 immunocompromised individuals. *Cell* S0092867422001386 (2022) doi:10.1016/j.cell.2022.01.027.
- 309 24. Röltgen, K. *et al.* Immune imprinting, breadth of variant recognition, and germinal center response in human  
310 SARS-CoV-2 infection and vaccination. *Cell* **185**, 1025-1040.e14 (2022).
- 311 25. Kim, W. *et al.* Germinal centre-driven maturation of B cell response to mRNA vaccination. *Nature* **604**, 141–  
312 145 (2022).
- 313 26. Case, J. B. *et al.* Neutralizing antibody and soluble ACE2 inhibition of a replication-competent VSV-SARS-  
314 CoV-2 and a clinical isolate of SARS-CoV-2. *Cell Host Microbe* **28**, 475-485.e5 (2020).
- 315 27. Case, J. B. *et al.* Neutralizing antibody and soluble ACE2 inhibition of a replication-competent VSV-SARS-  
316 CoV-2 and a clinical isolate of SARS-CoV-2. *Cell Host Microbe* **28**, 475-485.e5 (2020).

- 317 28. Liu, Z. *et al.* Identification of SARS-CoV-2 spike mutations that attenuate monoclonal and serum antibody  
318 neutralization. *Cell Host Microbe* **29**, 477-488.e4 (2021).
- 319 29. Turner, J. S. *et al.* Human germinal centres engage memory and naive B cells after influenza vaccination.  
320 *Nature* **586**, 127–132 (2020).
- 321 30. Ellebedy, A. H. *et al.* Defining antigen-specific plasmablast and memory B cell subsets in human blood after  
322 viral infection or vaccination. *Nat. Immunol.* **17**, 1226–1234 (2016).
- 323 31. Radbruch, A. *et al.* Competence and competition: the challenge of becoming a long-lived plasma cell. *Nat. Rev.*  
324 *Immunol.* **6**, 741–750 (2006).
- 325 32. Weisel, F. J., Zuccarino-Catania, G. V., Chikina, M. & Shlomchik, M. J. A temporal switch in the germinal  
326 center determines differential output of memory B and plasma cells. *Immunity* **44**, 116–130 (2016).
- 327 33. Ellebedy, A. H. *et al.* Adjuvanted H5N1 influenza vaccine enhances both cross-reactive memory B cell and  
328 strain-specific naive B cell responses in humans. *Proc. Natl. Acad. Sci.* **117**, 17957–17964 (2020).
- 329 34. Zost, S. J. *et al.* Potently neutralizing and protective human antibodies against SARS-CoV-2. *Nature* **584**, 443–  
330 449 (2020).
- 331 35. Chen, P. *et al.* SARS-CoV-2 neutralizing antibody LY-CoV555 in outpatients with COVID-19. *N. Engl. J.*  
332 *Med.* **384**, 229–237 (2021).
- 333 36. Hansen, J. *et al.* Studies in humanized mice and convalescent humans yield a SARS-CoV-2 antibody cocktail.  
334 *Science* **369**, 1010–1014 (2020).
- 335 37. Alsoussi, W. B. *et al.* A potently neutralizing antibody protects mice against SARS-CoV-2 infection. *J.*  
336 *Immunol.* **205**, 915–922 (2020).
- 337 38. Chen, R. E. *et al.* In vivo monoclonal antibody efficacy against SARS-CoV-2 variant strains. *Nature* (2021)  
338 doi:10.1038/s41586-021-03720-y.
- 339 39. Francis, T. On the Doctrine of Original Antigenic Sin. *Proc. Am. Philos. Soc.* **104**, 572–578 (1953).
- 340 40. Gostic, K. M., Ambrose, M., Worobey, M. & Lloyd-Smith, J. O. Potent protection against H5N1 and H7N9  
341 influenza via childhood hemagglutinin imprinting. *Science* **354**, 722–726 (2016).
- 342 41. Zang, R. *et al.* TMPRSS2 and TMPRSS4 promote SARS-CoV-2 infection of human small intestinal  
343 enterocytes. *Sci. Immunol.* **5**, eabc3582 (2020).

- 344 42. Stadlbauer, D. *et al.* SARS-CoV-2 seroconversion in humans: a detailed protocol for a serological assay,  
345 antigen production, and test setup. *Curr. Protoc. Microbiol.* **57**, (2020).
- 346 43. Fairhead, M. & Howarth, M. Site-specific biotinylation of purified proteins using BirA. *Methods Mol. Biol.*  
347 **1266**, 171–184 (2015).
- 348 44. Chen, R. E. *et al.* Resistance of SARS-CoV-2 variants to neutralization by monoclonal and serum-derived  
349 polyclonal antibodies. *Nat. Med.* (2021) doi:10.1038/s41591-021-01294-w.
- 350 45. Liu, Z. *et al.* Identification of SARS-CoV-2 spike mutations that attenuate monoclonal and serum antibody  
351 neutralization. *Cell Host Microbe* **29**, 477-488.e4 (2021).
- 352 46. VanBlargan, L. A. *et al.* A potently neutralizing SARS-CoV-2 antibody inhibits variants of concern by utilizing  
353 unique binding residues in a highly conserved epitope. *Immunity* **54**, 2399-2416.e6 (2021).
- 354 47. Mudd, P. A. *et al.* SARS-CoV-2 mRNA vaccination elicits a robust and persistent T follicular helper cell  
355 response in humans. *Cell* S0092867421014896 (2021) doi:10.1016/j.cell.2021.12.026.
- 356 48. Wrammert, J. *et al.* Broadly cross-reactive antibodies dominate the human B cell response against 2009  
357 pandemic H1N1 influenza virus infection. *J. Exp. Med.* **208**, 181–193 (2011).
- 358 49. Smith, K. *et al.* Rapid generation of fully human monoclonal antibodies specific to a vaccinating antigen. *Nat.*  
359 *Protoc.* **4**, 372–384 (2009).
- 360 50. Wrammert, J. *et al.* Rapid cloning of high-affinity human monoclonal antibodies against influenza virus. *Nature*  
361 **453**, 667–671 (2008).
- 362 51. Nachbagauer, R. *et al.* Broadly Reactive Human Monoclonal Antibodies Elicited following Pandemic H1N1  
363 Influenza Virus Exposure Protect Mice against Highly Pathogenic H5N1 Challenge. *J. Virol.* **92**, 1–17 (2018).
- 364 52. Brochet, X., Lefranc, M.-P. & Giudicelli, V. IMGT/V-QUEST: the highly customized and integrated system for  
365 IG and TR standardized V-J and V-D-J sequence analysis. *Nucleic Acids Res.* **36**, W503–W508 (2008).
- 366 53. Giudicelli, V., Brochet, X. & Lefranc, M.-P. IMGT/V-QUEST: IMGT Standardized Analysis of the  
367 Immunoglobulin (IG) and T Cell Receptor (TR) Nucleotide Sequences. *Cold Spring Harb. Protoc.* **2011**,  
368 pdb.prot5633-pdb.prot5633 (2011).
- 369 54. Vander Heiden, J. A. *et al.* pRESTO: a toolkit for processing high-throughput sequencing raw reads of  
370 lymphocyte receptor repertoires. *Bioinformatics* **30**, 1930–1932 (2014).



- 371 55. Turner, J. S. *et al.* SARS-CoV-2 mRNA vaccines induce persistent human germinal centre responses. *Nature*  
372 **596**, 109–113 (2021).
- 373 56. Schmitz, A. J. *et al.* A vaccine-induced public antibody protects against SARS-CoV-2 and emerging variants.  
374 *Immunity* **54**, 2159–2166.e6 (2021).
- 375 57. Ye, J., Ma, N., Madden, T. L. & Ostell, J. M. IgBLAST: an immunoglobulin variable domain sequence analysis  
376 tool. *Nucleic Acids Res.* **41**, W34–W40 (2013).
- 377 58. Gadala-Maria, D., Yaari, G., Uduman, M. & Kleinstein, S. H. Automated analysis of high-throughput B-cell  
378 sequencing data reveals a high frequency of novel immunoglobulin V gene segment alleles. *Proc. Natl. Acad.*  
379 *Sci.* **112**, E862–E870 (2015).
- 380 59. Zhou, J. Q. & Kleinstein, S. H. Cutting Edge: Ig H Chains Are Sufficient to Determine Most B Cell Clonal  
381 Relationships. *J. Immunol.* **203**, 1687–1692 (2019).
- 382 60. Gupta, N. T. *et al.* Hierarchical Clustering Can Identify B Cell Clones with High Confidence in Ig Repertoire  
383 Sequencing Data. *J. Immunol.* **198**, 2489–2499 (2017).
- 384 61. Gupta, N. T. *et al.* Change-O: a toolkit for analyzing large-scale B cell immunoglobulin repertoire sequencing  
385 data. *Bioinformatics* **31**, 3356–3358 (2015).
- 386 62. Gu, Z., Gu, L., Eils, R., Schlesner, M. & Brors, B. circlize implements and enhances circular visualization in R.  
387 *Bioinformatics* **30**, 2811–2812 (2014).
- 388 63. Wolf, F. A., Angerer, P. & Theis, F. J. SCANPY: large-scale single-cell gene expression data analysis. *Genome*  
389 *Biol.* **19**, 15 (2018).
- 390 64. Turner, J. S. *et al.* Germinal centres foster recall and de novo human B cell responses to influenza vaccination.  
391 (2020).
- 392 65. Haebe, S. *et al.* Single-cell analysis can define distinct evolution of tumor sites in follicular lymphoma. *Blood*  
393 **137**, 2869–2880 (2021).
- 394 66. Mourcin, F. *et al.* Follicular lymphoma triggers phenotypic and functional remodeling of the human lymphoid  
395 stromal cell landscape. *Immunity* **54**, 1788–1806.e7 (2021).

396

397 **Acknowledgements**

398 We thank all the donors for generously providing precious specimens. We thank Lisa  
399 Kessels and the Washington University School of Medicine 382 Study Team (study coordinators  
400 Alem Haile, Ryley Thompson, Delaney Carani, RN, Kim Gray, MSN, APRN-BC, and Chapelle  
401 Ayres; pharmacists Michael Royal, RPh and John Tran; and laboratory technicians Laura Blair,  
402 Anita Afghanzada, and Natalie Schodl) for assistance with scheduling participants and sample  
403 collection. We thank Pamela Woodard, Betsy Thomas, Mike Harrod, Rosemary Hamlin, Maggie  
404 Rohn, and the staff of the Center for Clinical Research Imaging at Washington University School  
405 of Medicine for assistance with sample collection. We thank Claire Dalton and Brittany  
406 Roemmich for performing the nucleocapsid binding assay. The WU382 study was reviewed and  
407 approved by the Washington University Institutional Review Board (approval no. 202109021).

408

409 **Funding**

410 This work was supported in part with funding from the US National Institutes of Health  
411 (NIH) and Moderna, Inc. The Ellebody laboratory was supported by NIH grants U01AI141990,  
412 1U01AI150747, 5U01AI144616-02, and R01AI168178-01. The Diamond laboratory was  
413 supported by NIH grant R01 AI157155. The Whelan laboratory was supported by NIH grant  
414 R01 AI163019.

415

416 **Author contributions**

417 AHE, JAO, RMP, RP, BN, and SC conceived designed the study. JAO, MKK, and RMP  
418 wrote and maintained the IRB protocol, recruited participants, and coordinated sample  
419 collection. WBA, WK, FH, and JST processed specimens. WBA, SKM, and JST performed

420 multiplex bead array and ELISA. WBA, FH, and JST performed ELISpot. WBA and SKM  
421 performed VSV neutralization assays. WBA, SKM, WK, AJSchmitz, TL, SCH, AJSturtz, KMM,  
422 BE, IFF, and JST generated and characterized monoclonal antibodies. JQZ analyzed scRNA-seq  
423 and BCR repertoire data. ZL rescued and produced the chimeric vesicular stomatitis viruses for  
424 neutralization assays and performed and analyzed epitope mapping. BY performed the SARS-  
425 CoV-2 virus neutralization assays. WK and AJSturtz prepared libraries for scRNA-seq.  
426 AJSchmitz performed RNA extractions and library preparation for BCR bulk sequencing and  
427 expressed SARS-CoV-2 S and variant proteins. SMS generated the authentic SARS-CoV-2 virus  
428 stocks. CWF supervised the nucleocapsid binding assay. IP supervised bone marrow specimen  
429 collection. BSS and WDM performed FNA. BSS, WDM, and SAT supervised lymph node  
430 evaluation prior to FNA and specimen collection and evaluated lymph node ultrasound data. JST  
431 sorted cells and collected and analysed the flow cytometry data. LP-R, RP, RN, JST, and AHE  
432 analyzed data. AHE, MSD, and SPJW supervised experiments and obtained funding. JST and  
433 AHE composed the manuscript. All authors reviewed and edited the manuscript.

434

### 435 **Competing interests**

436 The Ellebedy laboratory and Infectious Disease Clinical Research Unit received funding  
437 under sponsored research agreements from Moderna related to the data presented in the current  
438 study. The Ellebedy laboratory received funding from Emergent BioSolutions and AbbVie that  
439 are unrelated to the data presented in the current study. AHE is a consultant for Mubadala  
440 Investment Company and the founder of ImmuneBio Consulting. WBA, AJSchmitz, SPJW,  
441 MSD, JST, and AHE are recipients of a licensing agreement with Abbvie that is unrelated to the  
442 data presented in the current study. MSD is a consultant for Inbios, Vir Biotechnology, Senda

443 Biosciences, Moderna, Sterne-Kessler, and Immunome. The Diamond laboratory has received  
444 unrelated funding support in sponsored research agreements from Vir Biotechnology, Emergent  
445 BioSolutions, and Moderna. SPJW is a consultant for Thylacine Bio. SPJW is a recipient of a  
446 licensing agreement with Vir Biotechnology and Merck. The Whelan laboratory has received  
447 unrelated funding support in sponsored research agreements from Vir Biotechnology. RP, BN,  
448 SC, and RN are employees of and shareholders in Moderna, Inc. The content of this manuscript  
449 is solely the responsibility of the authors and does not necessarily represent the official view of  
450 NIAID or NIH.

451

#### 452 **Data and materials availability**

453         Antibody sequences are deposited on GenBank under the following accession numbers:  
454 xx–xx, available from GenBank/EMBL/DDBJ. Bulk sequencing reads are deposited on  
455 Sequence Read Archive under BioProject xx. The IMGT/V-QUEST database is accessible at  
456 [http://www.imgt.org/IMGT\\_vquest/](http://www.imgt.org/IMGT_vquest/). Materials are available upon request, through a simple  
457 interinstitutional materials transfer agreement.

## 458 **Materials and Methods**

459 **Sample collection, preparation, and storage.** All studies were approved by the  
460 Institutional Review Board of Washington University in St. Louis. Written consent was obtained  
461 from all participants. Fifty-four healthy volunteers were enrolled, of whom 26 and 15 provided  
462 axillary LN and bone marrow aspirate samples, respectively (**Extended Data Table 1**). Blood  
463 samples were collected in ethylenediaminetetraacetic acid (EDTA) evacuated tubes (BD), and  
464 peripheral blood mononuclear cells (PBMC) were enriched by density gradient centrifugation  
465 over Lymphopure (BioLegend). The residual red blood cells were lysed with ammonium  
466 chloride lysis buffer, washed with PBS supplemented with 2% FBS and 2 mM EDTA (P2), and  
467 PBMC were immediately used or cryopreserved in 10% dimethylsulfoxide (DMSO) in FBS.  
468 Ultrasound-guided FNA of axillary LNs was performed by a radiologist. LN dimensions and  
469 cortical thickness were measured, and the presence and degree of cortical vascularity and  
470 location of the LN relative to the axillary vein were determined prior to each FNA. For each  
471 FNA sample, six passes were made under continuous real-time ultrasound guidance using 22- or  
472 25-gauge needles, each of which was flushed with 3 mL of RPMI 1640 supplemented with 10%  
473 FBS and 100 U/mL penicillin/streptomycin, followed by three 1-mL rinses. Red blood cells were  
474 lysed with ammonium chloride buffer (Lonza), washed with P2, and immediately used or  
475 cryopreserved in 10% DMSO in FBS. Participants reported no adverse effects from  
476 phlebotomies or serial FNAs. Bone marrow aspirates of approximately 30 mL were collected in  
477 EDTA tubes from the iliac crest. Bone marrow mononuclear cells were enriched by density  
478 gradient centrifugation over Ficoll-Paque PLUS (Cytiva), and remaining red blood cells were  
479 lysed with ammonium chloride buffer (Lonza) and washed with P2. Bone marrow plasma cells  
480 (BMPC) were enriched from bone marrow mononuclear cells using the EasySep Human CD138

481 Positive Selection Kit II (StemCell Technologies) and immediately used for ELISpot or  
482 cryopreserved in 10% DMSO in FBS.

483 **Cell lines.** Expi293F cells were cultured in Expi293 Expression Medium (Gibco). Vero-  
484 TMPRSS2 cells<sup>40</sup> (a gift from Siyuan Ding, Washington University School of Medicine) were  
485 cultured at 37 °C in Dulbecco's modified Eagle medium (DMEM) supplemented with 10% fetal  
486 bovine serum (FBS), 10 mM HEPES (pH 7.3), 1 mM sodium pyruvate, 1× nonessential amino  
487 acids, 100 U/mL of penicillin–streptomycin, and 5 µg/mL of blasticidin.

488 **Antigens.** Recombinant soluble spike protein (S) from WA1/2020, B.1.351, B.1.617.2,  
489 B.1.1.529 (BA.1) strains of SARS-CoV-2 and their Avi-tagged counterparts were expressed as  
490 previously described<sup>24,41</sup>. Briefly, mammalian cell codon-optimized nucleotide sequences  
491 coding for the soluble ectodomain of S (GenBank: MN908947.3, amino acids 1-1213) including  
492 a C-terminal thrombin cleavage site, T4 foldon trimerization domain, and hexahistidine tag were  
493 cloned into mammalian expression vector pCAGGS. The S sequences were modified to remove  
494 the polybasic cleavage site (RRAR to A), and two pre-fusion stabilizing proline mutations were  
495 introduced (K986P and V987P, wild type numbering). For expression of Avi-tagged variants, the  
496 CDS of pCAGGS vector containing the sequence for the relevant soluble S was modified to  
497 encode 3' Avitag insert after the 6xHIS tag (5'-HIS tag-  
498 GGCTCCGGGCTGAACGACATCTTCGAAGCCCAGAAGATTGAGTGGCATGAG-Stop-3';  
499 HHHHHHGSGLNDIFEAQKIEWHE-) using inverse PCR mutagenesis as previously described  
500<sup>42</sup>. Recombinant proteins were produced in Expi293F cells (ThermoFisher) by transfection with  
501 purified DNA using the ExpiFectamine 293 Transfection Kit (ThermoFisher). Supernatants from  
502 transfected cells were harvested 3 days post-transfection, and recombinant proteins were purified  
503 using Ni-NTA agarose (ThermoFisher), then buffer exchanged into phosphate buffered saline

504 (PBS) and concentrated using Amicon Ultracel centrifugal filters (EMD Millipore). To  
505 biotinylate Avi-tagged S variants, the S-Avitag substrates were diluted to 40  $\mu$ M and incubated  
506 for 1 h at 30°C with 15  $\mu$ g/mL BirA enzyme (Avidity) in 0.05 M bicine buffer at pH 8.3  
507 supplemented with 10 mM ATP, 10 mM MgOAc, and 50  $\mu$ M biotin. The protein was then  
508 concentrated/buffer exchanged with PBS using a 100 kDa Amicon Ultra centrifugal filter  
509 (MilliporeSigma).

510 To generate antigen probes for flow cytometry staining and sorting, trimeric BirA-  
511 biotinylated recombinant S from WA1/2020, B.1.351, B.1.617.2, or B.1.1.529 (BA.1) were  
512 incubated with a 1.04-fold molar excess of BV421-, BV650-, or PE-conjugated streptavidin  
513 (BioLegend) on ice, with three equal additions of S spaced every 15 min. Fifteen min after the  
514 third S addition, D-biotin was added in 6-fold molar excess to streptavidin to block any  
515 unoccupied biotin binding sites. SA-PE-Cy5 was blocked with a 6-fold molar excess of D-biotin  
516 and used as a background staining control. Bovine serum albumin (BSA) was biotinylated using  
517 the EZ-Link Micro NHS-PEG4-Biotinylation Kit (Thermo Fisher); excess unreacted biotin was  
518 removed using 7-kDa Zeba desalting columns (Pierce).

519 **ELISpot assay.** Wells were coated with Flucelvax Quadrivalent 2019/2020 seasonal  
520 influenza virus vaccine (Sequiris), recombinant S from the WA1/2020, B.1.351, B.1.617.2, or  
521 BA.1 strains of SARS-CoV-2, or pooled anti- $\kappa$  and anti- $\lambda$  light chain antibodies (Cellular  
522 Technology Limited). Direct *ex-vivo* ELISpot assays were performed to determine the number of  
523 total, influenza vaccine-binding, or recombinant S-binding IgG- and IgA-secreting cells present  
524 in PBMC and enriched BMPC samples using IgG/IgA double-color ELISpot Kits (Cellular  
525 Technology Limited) according to the manufacturer's instructions. ELISpot plates were analyzed  
526 using an ELISpot counter (Cellular Technology Limited).

527           **Fluorescent bead antigen binding assay.** Recombinant biotinylated S from WA1/2020,  
528 B.1.351, B.1.617.2, and BA.1 strains of SARS-CoV-2 and biotinylated BSA were incubated for  
529 30 min on ice with different fluorescence intensity peaks of the Streptavidin Coated Fluorescent  
530 Yellow Particle Kit (Spherotech) at 9.12 ng per  $\mu\text{g}$  beads. Beads were washed twice with 0.05%  
531 Tween 20 in PBS, resuspended in monoclonal antibodies diluted to 65  $\mu\text{g}/\text{mL}$  or plasma  
532 samples diluted 1:80 in 0.05% Tween 20 in PBS, and incubated for 30 min on ice. Beads were  
533 washed twice with 0.05% Tween 20 in PBS, stained with IgG-APC-Fire750 (M1310G05,  
534 BioLegend, 1:100), incubated for 30 min on ice, washed twice with 0.05% Tween 20 in PBS,  
535 and resuspended in 2% FBS and 2 mM EDTA in PBS and acquired on an Aurora using  
536 SpectroFlo v2.2 (Cytex). Data were analyzed using FlowJo v10 (Treestar). Background-  
537 subtracted median fluorescence intensities were calculated for each sample by subtracting its  
538 median fluorescence intensity plus two times robust standard deviation for BSA and the median  
539 fluorescence intensity of an influenza virus hemagglutinin-specific monoclonal antibody or  
540 plasma collected prior to the SARS-CoV-2 pandemic for the respective spike variant.

541           **ELISA.** Assays were performed in 96-well plates (MaxiSorp; Thermo) coated with 100  
542  $\mu\text{L}$  of recombinant S from WA1/2020, B.1.351, B.1.617.2, and BA.1 strains of SARS-CoV-2, N-  
543 terminal domain of BA.1, receptor binding domain of BA.1, or S2 domain of WA1/2020, or  
544 bovine serum albumin diluted to 1  $\mu\text{g}/\text{mL}$  in PBS, and plates were incubated at 4°C overnight.  
545 Plates then were blocked with 10% FBS and 0.05% Tween 20 in PBS. Purified mAbs were  
546 serially diluted in blocking buffer and added to the plates. Plates were incubated for 90 min at  
547 room temperature and then washed 3 times with 0.05% Tween 20 in PBS. Goat anti-human IgG-  
548 HRP (goat polyclonal, Jackson ImmunoResearch, 1:2,500) was diluted in blocking buffer before  
549 adding to plates and incubating for 60 min at room temperature. Plates were washed 3 times with



550 0.05% Tween 20 in PBS and 3 times with PBS before the addition of o-phenylenediamine  
551 dihydrochloride peroxidase substrate (Sigma-Aldrich). Reactions were stopped by the addition of  
552 1 M hydrochloric acid. Optical density measurements were taken at 490 nm.

553 **Vesicular Stomatitis Virus (VSV)-SARS-CoV-2-S<sub>Δ21</sub> eGFP-Reduction Assay.** The S  
554 genes of SARS-CoV-2 isolate WA1/2020 (with D614G mutation) and B.1.351 were synthesized  
555 and replaced the native envelope glycoprotein of an infectious molecular clone of VSV, and  
556 resulting chimeric viruses expressing S protein from SARS-CoV-2 D614G or B.1.351 were used  
557 for GFP reduction neutralization tests as previously described<sup>25</sup>. Briefly, 10<sup>3</sup> PFU of VSV-  
558 SARS-CoV-2-S<sub>Δ21</sub> was incubated for 1 h at 37°C with recombinant mAbs diluted to 5 µg/mL.  
559 Antibody-virus complexes were added to Vero E6 cells in 96-well plates and incubated at 37°C  
560 for 7.5 h. Cells were subsequently fixed in 2% formaldehyde (Electron Microscopy Sciences)  
561 containing 10 µg/mL Hoechst 33342 nuclear stain (Invitrogen) for 45 min at room temperature,  
562 when fixative was replaced with PBS. Images were acquired with an InCell 2000 Analyzer (GE  
563 Healthcare) automated microscope using the DAPI and FITC channels to visualize nuclei and  
564 infected cells (i.e., eGFP-positive cells), respectively (4X objective, 4 fields per well, covering  
565 the entire well). Images were analyzed using the Multi Target Analysis Module of the InCell  
566 Analyzer 1000 Workstation Software (GE Healthcare). GFP-positive cells were identified in the  
567 FITC channel using the top-hat segmentation method and subsequently counted within the InCell  
568 Workstation software. The sensitivity and accuracy of GFP-positive cell number determinations  
569 were validated using a serial dilution of virus. The percent infection reduction was calculated  
570 from wells to which no antibody was added. A background number of GFP-positive cells was  
571 subtracted from each well using an average value determined from at least 4 uninfected wells.

572           **Focus reduction neutralization test.** Each mAb was incubated at 5 µg/mL in DMEM  
573 supplemented with 2% FBS, 10 mM HEPES, and 100 U/mL penicillin/streptomycin with 10<sup>2</sup>  
574 focus-forming units (FFU) of different of SARS-CoV-2 strains (WA1/2020 D614G, B.1.351,  
575 B.1.617.2, BA.1, and BA.5) for 1 h at 37°C<sup>44</sup>. Antibody-virus complexes were added to Vero-  
576 TMPRSS2 cell monolayers in 96-well plates and incubated at 37°C for 1 h. Subsequently, cells  
577 were overlaid with 1% (w/v) methylcellulose in MEM supplemented with 2% FBS. Plates were  
578 harvested 30 h (D614G, B.1.351, or B.1.617.2-infected) or 70 h (BA.1 or BA.5-infected) later by  
579 removing overlays and fixed with 4% PFA in PBS for 20 min at room temperature. Plates were  
580 washed and incubated with an oligoclonal pool of anti-S antibodies (SARS2-2, SARS2-11,  
581 SARS2-16, SARS2-31, SARS2-38, SARS2-57, and SARS2-71)<sup>44</sup>, and an additional oligoclonal  
582 pool of anti-S antibodies with extended reactivity (SARS2-08, -09, -10, -13, -14, -17, -20, -26, -  
583 27, -28, -31, -41, -42, -44, -49, -62, -64, -65, and -67)<sup>45</sup> were included for staining BA.1 or BA.5  
584 infected plates. Plates were subsequently incubated with HRP-conjugated goat anti-mouse IgG  
585 (Sigma 12-349) in PBS supplemented with 0.1% saponin and 0.1% bovine serum albumin.  
586 SARS-CoV-2-infected cell foci were visualized using TrueBlue peroxidase substrate (KPL) and  
587 quantitated on an ImmunoSpot microanalyzer (Cellular Technologies Limited).

588           **Selection of mAb escape mutants in SARS-CoV-2 S.** We used VSV-SARS-CoV-2-S  
589 (BA.1 variant) chimera to select for SARS-CoV-2 S variants that escape mAb neutralization as  
590 described previously<sup>26,27</sup>. Antibody neutralization resistant mutants were recovered by plaque  
591 isolation. Briefly, plaque assays were performed to isolate the VSV-SARS-CoV-2 escape mutant  
592 on Vero cells with each tested mAb in the overlay. The concentration of each mAb in the overlay  
593 was determined by neutralization assays at a multiplicity of infection of 100. Escape clones were  
594 plaque-purified on Vero cells in the presence of mAbs, and plaques in agarose plugs were

595 amplified on MA104 cells with the mAbs present in the medium. Viral supernatants were  
596 harvested upon extensive cytopathic effect and clarified of cell debris by centrifugation at 1,000  
597 x g for 5 min. Aliquots were maintained at -80°C. Viral RNA was extracted from VSV-SARS-  
598 CoV-2 mutant viruses using RNeasy Mini kit (Qiagen), and the S gene was amplified using  
599 OneStep RT-PCR Kit (Qiagen). The mutations were identified by Sanger sequencing (Genewiz).

600 **Cell sorting and flow cytometry.** Staining for flow cytometry analysis and sorting was  
601 performed using freshly isolated or cryo-preserved FNA or PBMC samples. For analysis, PBMC  
602 were incubated for 30 min on ice with purified CD16 (3G8, BioLegend, 1:100), CD32 (FUN-2,  
603 BioLegend, 1:100), CD64 (10.1, BioLegend, 1:100) and PD-1-BB515 (EH12.1, BD Horizon,  
604 1:100) in 2% FBS and 2 mM EDTA in PBS (P2), washed twice, then were stained for 30 min on  
605 ice with WA1/2020, B.1.351, B.1.617.2, and BA.1 spike probes pre-conjugated to SA-BV650  
606 and SA-PE, S<sub>167-180</sub>-PE-Cy7 tetramer, S<sub>816-830</sub>-APC tetramer<sup>46</sup>, biotin-saturated SA-PE-Cy5,  
607 ICOS-SB436 (ISA-3, Invitrogen, 1:50), IgG-BV480 (goat polyclonal, Jackson ImmunoResearch,  
608 1:100), IgA-FITC (M24A, Millipore, 1:500), CD8a-A532 (RPA-T8, Thermo, 1:100), CD38-  
609 BB700 (HIT2, BD Horizon, 1:500), CD71-BV421 (CY1G4, 1:400), CD20-Pacific Blue (2H7,  
610 1:400), CD4-Spark Violet 538 (SK3, 1:400), CD19-BV750 (HIB19, 1:100), IgD-BV785 (IA6-2,  
611 1:200), CXCR5-PE-Dazzle 594 (J252D4, 1:50), CD14-PerCP (HCD14, 1:50), CD27-PE-Fire810  
612 (O323, 1:200), CCR7-Spark 685 (G043H7, 1:100), IgM-A700 (MHM-88, 1:400), CD3-APC-  
613 Fire810 (SK7, 1:50), and Zombie NIR (all BioLegend) diluted in Brilliant Staining buffer (BD  
614 Horizon). FNA samples were incubated for 30 min on ice with purified CD16 (3G8, BioLegend,  
615 1:100), CD32 (FUN-2, BioLegend, 1:100), CD64 (10.1, BioLegend, 1:100) and PD-1-BB515  
616 (EH12.1, BD Horizon, 1:100) in P2, washed twice, then stained for 30 min on ice with  
617 WA1/2020, 1.351, 1.617.2, and 1.1.529 spike probes pre-conjugated to SA-BV421 and SA-

618 BV650, S<sub>167-180</sub>-APC tetramer, biotin-saturated SA-PE-Cy5, IgG-BV480 (goat polyclonal,  
619 Jackson ImmunoResearch, 1:100), IgA-FITC (M24A, Millipore, 1:500), CD8a-A532 (RPA-T8,  
620 Thermo, 1:100), CD38-BB700 (HIT2, BD Horizon, 1:500), CD20-Pacific Blue (2H7, 1:400),  
621 CD4-Spark Violet 538 (SK3, 1:400), IgM-BV605 (MHM-88, 1:100), CD19-BV750 (HIB19,  
622 1:100), IgD-BV785 (IA6-2, 1:200), CXCR5-PE-Dazzle 594 (J252D4, 1:50), CD14-PerCP  
623 (HCD14, 1:50), CD71-PE-Cy7 (CY1G4, 1:400), CD27-PE-Fire810 (O323, 1:200), CD3-APC-  
624 Fire810 (SK7, 1:50), and Zombie NIR (all BioLegend) diluted in Brilliant Staining buffer (BD  
625 Horizon). Cells were washed twice with P2, fixed for 1 h at 25°C using the True Nuclear fixation  
626 kit (BioLegend), washed twice with True Nuclear Permeabilization/Wash buffer, stained with  
627 Ki-67-BV711 (Ki-67, BioLegend, 1:200), Blimp1-PE (646702, R&D, 1:100), FoxP3-Spark 685  
628 (206D, BioLegend, 1:200), and Bcl6-R718 (K112-91, BD Horizon, 1:200) for 1 h at 25°C, and  
629 washed twice with True Nuclear Permeabilization/Wash buffer. Samples were resuspended in P2  
630 and acquired on an Aurora using SpectroFlo v2.2 (Cytex). Flow cytometry data were analyzed  
631 using FlowJo v10 (Treestar).

632 For sorting PB, PBMC collected 1 week post-boost were stained for 30 min on ice with  
633 CD20-Pacific Blue (2H7, 1:400), CD71-FITC (CY1G4, 1:200), IgD-PerCP-Cy5.5 (IA6-2,  
634 1:200), CD19-PE (HIB19, 1:200), CXCR5-PE-Dazzle 594 (J252D4, 1:50), CD38-PE-Cy7  
635 (HIT2, 1:200), CD4-A700 (SK3, 1:400), and Zombie Aqua (all BioLegend) diluted in P2. Cells  
636 were washed twice, and PB (live singlet CD4<sup>-</sup> CD19<sup>+</sup> IgD<sup>lo</sup> CD20<sup>lo</sup> CD38<sup>+</sup> CXCR5<sup>lo</sup> CD71<sup>+</sup>)  
637 were sorted using a Bigfoot (Invitrogen) into PBS supplemented with 0.05% BSA and  
638 immediately processed for single cell RNAseq. For bulk sorting GC and LNPC, lymph node  
639 FNA samples collected 2 or 8 weeks post-boost were stained for 30 min on ice with purified  
640 CD16 (3G8, BioLegend, 1:100), CD32 (FUN-2, BioLegend, 1:100), CD64 (10.1, BioLegend,

641 1:100) and PD-1-BB515 (EH12.1, BD Horizon, 1:100) in P2, washed twice, then stained for 30  
642 min on ice with CD20-Pacific Blue (2H7, 1:400), CD19-BV750 (HIB19, 1:100), IgD-PerCP-  
643 Cy5.5 (IA6-2, 1:200), CD71-PE (CY1G4, 1:400), CXCR5-PE-Dazzle 594 (J252D4, 1:50),  
644 CD38-PE-Cy7 (HIT2, 1:200), CD4-A700 (SK3, 1:400), and Zombie Aqua (all BioLegend)  
645 diluted in P2. Cells were washed twice, and total GC B cells (live singlet CD4<sup>-</sup> CD19<sup>+</sup> IgD<sup>lo</sup>  
646 CD20<sup>+</sup> CD38<sup>int</sup> CXCR5<sup>+</sup> CD71<sup>+</sup>) and LNPC (live singlet CD4<sup>-</sup> CD19<sup>+</sup> IgD<sup>lo</sup> CD20<sup>lo</sup> CD38<sup>+</sup>  
647 CXCR5<sup>lo</sup> CD71<sup>+</sup>) were sorted using a Bigfoot (Invitrogen) into Buffer RLT Plus (Qiagen)  
648 supplemented with 143 mM β-mercaptoethanol (Sigma-Aldrich) and immediately frozen on dry  
649 ice. For sorting memory B cells, PBMC collected 17 weeks post-boost were incubated for 10  
650 min on ice with purified CD16 (3G8, BioLegend, 1:100), CD32 (FUN-2, BioLegend, 1:100), and  
651 CD64 (10.1, BioLegend, 1:100) in P2. For sorting S<sup>+</sup> memory B cells, WA1/2020, B.1.351,  
652 B.1.617.2, and BA.1 spike probes pre-conjugated to SA-BV650 and SA-PE, biotin-saturated SA-  
653 PE-Cy5, CD20-Pacific Blue (2H7, 1:400), CD19-BV605 (HIB19, 1:100), IgD-BV785 (IA6-2,  
654 1:200), CD3-FITC (HIT3a, 1:200), CD27-A700 (M-T271, 1:200), and Zombie NIR (all  
655 BioLegend) diluted in Brilliant Staining buffer (BD Horizon) were added and stained for an  
656 additional 30 min on ice. For sorting BA.1<sup>+</sup> WA1/2020<sup>-</sup> memory B cells, WA1/2020 probes pre-  
657 conjugated to SA-BV650 and SA-APC, BA.1 probes pre-conjugated to SA-BV421 and SA-PE,  
658 biotin-saturated SA-PE-Cy5, CD20-Pacific Blue (2H7, 1:400), IgD-BV785 (IA6-2, 1:200),  
659 CD19-FITC (HIB19, 1:100), CD27-PE-Fire810 (O323, 1:200), CD3-A700 (HIT3a, 1:100), and  
660 Zombie NIR (all BioLegend) diluted in Brilliant Staining buffer (BD Horizon) were added and  
661 stained for an additional 30 min on ice. Cells were washed twice, and pooled S-binding single  
662 memory B cells (live singlet CD3<sup>-</sup> CD19<sup>+</sup> IgD<sup>lo</sup> SA-PE-Cy5<sup>-</sup> pooled spikes double positive) or  
663 BA.1<sup>+</sup> WA1/2020<sup>-</sup> single memory B cells (live singlet CD3<sup>-</sup> CD19<sup>+</sup> IgD<sup>lo</sup> SA-PE-Cy5<sup>-</sup> BA.1<sup>+</sup>

664 WA1/2020<sup>-</sup>) were sorted using a Bigfoot (Invitrogen) into 96-well plates containing 2  $\mu$ L Lysis  
665 Buffer (Clontech) supplemented with 1 U/ $\mu$ L RNase inhibitor (NEB), or total IgD<sup>lo</sup> memory B  
666 cells were bulk sorted into Buffer RLT Plus (Qiagen) supplemented with 143 mM  $\beta$ -  
667 mercaptoethanol (Sigma-Aldrich) and immediately frozen on dry ice.

668 **Monoclonal antibody (mAb) generation.** Antibodies were cloned as described  
669 previously<sup>47</sup>. Briefly, VH, V $\kappa$ , and V $\lambda$  genes were amplified by reverse transcription-PCR and  
670 nested PCR reactions from singly-sorted S<sup>+</sup> memory B cells using primer combinations specific  
671 for IgG, IgM/A, Ig $\kappa$ , and Ig $\lambda$  from previously described primer sets<sup>48</sup> and then sequenced. To  
672 generate recombinant antibodies, restriction sites were incorporated via PCR with primers to the  
673 corresponding heavy and light chain V and J genes. The amplified VH, V $\kappa$ , and V $\lambda$  genes were  
674 cloned into IgG1 and Ig $\kappa$  or Ig $\lambda$  expression vectors, respectively, as described previously<sup>48-50</sup>.  
675 Heavy and light chain plasmids were co-transfected into Expi293F cells (Gibco) for expression,  
676 and antibody was purified using protein A agarose chromatography (Goldbio). Sequences were  
677 obtained from PCR reaction products and annotated using the ImMunoGeneTics (IMGT)/V-  
678 QUEST database ([http://www.imgt.org/IMGT\\_vquest/](http://www.imgt.org/IMGT_vquest/))<sup>51,52</sup>. Mutation frequency was calculated  
679 by counting the number of nonsynonymous nucleotide mismatches from the germline sequence  
680 in the heavy chain variable segment leading up to the CDR3, while excluding the 5' primer  
681 sequences that could be error-prone.

682 **Single-cell RNA-seq library preparation and sequencing** Sorted PB and LN FNA  
683 samples were processed using the following 10x Genomics kits: Chromium Next GEM Single  
684 Cell 5' Kit v2 (PN-1000263); Chromium Next GEM Chip K Single Cell Kit (PN-1000286); BCR  
685 Amplification Kit (PN-1000253); Dual Index Kit TT Set A (PN-1000215). Chromium Single  
686 Cell 5' Gene Expression Dual Index libraries and Chromium Single Cell V(D)J Dual Index

687 libraries were prepared according to manufacturer's instructions. Both gene expression and  
688 V(D)J libraries were sequenced on a Novaseq S4 (Illumina), targeting a median sequencing  
689 depth of 50,000 and 5,000 read pairs per cell, respectively.

690 **Bulk BCR library preparation and sequencing.** RNA was purified from sorted PBs  
691 and memory B cells from PBMC, GC B cells and plasma cells from LN FNA (LNPC), and  
692 CD138-enriched BMPC using the RNeasy Plus Micro kit (Qiagen). Reverse transcription,  
693 unique molecular identifier (UMI) barcoding, cDNA amplification, and Illumina linker addition  
694 to B cell heavy chain transcripts were performed using the human NEBNext Immune  
695 Sequencing Kit (New England Biolabs) according to the manufacturer's instructions. High-  
696 throughput 2x300bp paired-end sequencing was performed on the Illumina MiSeq platform with  
697 a 30% PhiX spike-in according to manufacturer's recommendations, except for performing 325  
698 cycles for read 1 and 275 cycles for read 2.

699 **Preprocessing of bulk sequencing BCR reads.** Preprocessing of demultiplexed pair-end  
700 reads was performed using pRESTO v.0.6.2<sup>53</sup>) as previously described<sup>54</sup>, with the exception that  
701 sequencing errors were corrected using the UMIs as they were without additional clustering  
702 (**Table S3**). Previously preprocessed unique consensus sequences from samples corresponding to  
703 participants in the current study and previously reported in<sup>24,54</sup> were included without additional  
704 processing. Participants 382-01, 382-02, 382-07, 382-08, 382-13, and 382-15 correspond to  
705 previously reported 368-22, 368-20, 368-02, 368-04, 368-01, and 368-10, respectively<sup>24,54</sup>.  
706 Previously preprocessed unique consensus sequences from samples corresponding to participants  
707 in the current study and reported in<sup>55</sup> were subset to those with at least two contributing reads  
708 and included.

709           **Preprocessing of 10x Genomics single-cell BCR reads.** Demultiplexed pair-end  
710 FASTQ reads were preprocessed using Cell Ranger v.6.0.1 as previously described<sup>24</sup> (**Extended**  
711 **Data Table 4**). Previously preprocessed single-cell BCR reads from samples corresponding to  
712 participants in the current study and reported in<sup>24</sup> were included.

713           **V(D)J gene annotation and genotyping.** Initial germline V(D)J gene annotation was  
714 performed on the preprocessed BCRs using IgBLAST v.1.17.1<sup>56</sup> with the deduplicated version of  
715 IMGT/V-QUEST reference directory release 202113-2<sup>51</sup>. Further sequence-level and cell-level  
716 quality controls were performed as previously described<sup>24</sup>. Exceptions for mAb sequences  
717 triggering QC filters were handled on a case-by-case basis upon inspection as follows. Indels  
718 detected in 382-01 1B04 heavy chain and 1F01 light chain and 382-53 2G07 heavy chain were  
719 accepted. The CDR3 annotations from IMGT/V-QUEST for 382-08 1G04 heavy chain, 382-54  
720 1D09 heavy chain, and 382-55 4H10 light chain were used in lieu of those from IgBLAST as the  
721 former had nucleotide lengths that were a multiple of 3 whereas the latter did not. Individualized  
722 genotypes were inferred based on sequences that passed all quality controls using TIgGER  
723 v.1.0.0<sup>57</sup> and used to finalize V(D)J annotations. Sequences annotated as non-productively  
724 rearranged by IgBLAST were removed from further analysis.

725           **Clonal lineage inference.** B cell clonal lineages were inferred on a by-individual basis  
726 based on productively rearranged sequences as previously described<sup>24</sup>. Briefly, heavy chain-  
727 based clonal inference<sup>58</sup> was performed by partitioning the heavy chains of bulk and single-cell  
728 BCRs based on common V and J gene annotations and CDR3 lengths, and clustering the  
729 sequences within each partition hierarchically with single linkage based on their CDR3s<sup>59</sup>.  
730 Sequences within 0.15 normalized Hamming distance from each other were clustered as clones.  
731 Following clonal inference, full-length clonal consensus germline sequences were reconstructed



732 using Change-O v.1.0.2<sup>60</sup>. Within each clone, duplicate IMGT-aligned V(D)J sequences from  
733 bulk sequencing were collapsed using Alakazam v1.1.0<sup>60</sup> except for duplicates derived from  
734 different lymph nodes, time points, tissues, B cell compartments, isotypes, or biological  
735 replicates.

736 **BCR analysis.** B cell compartment labels were treated as previously described<sup>24</sup>. Briefly,  
737 gene expression-based cluster annotation was used for single-cell BCRs; FACS-based sorting  
738 and magnetic enrichment were used for bulk BCRs, except that PB sorts from LN FNA were  
739 labelled LNPCs; post-2<sup>nd</sup> dose week 2 IgD<sup>lo</sup> enriched B cells from blood were labelled activated;  
740 and post-2<sup>nd</sup> dose week 4 and post-3<sup>rd</sup> dose (boost) week 17 IgD<sup>lo</sup> enriched B cells from blood  
741 were labelled memory. For analysis involving the memory compartment, the memory sequences  
742 were restricted to those from blood. A heavy chain-based B cell clone was considered S-specific  
743 if it contained any sequence corresponding to a S-binding mAb that was previously reported<sup>24,54</sup>  
744 or from the current study. Clonal overlap between B cell compartments was visualized using  
745 circlize v.0.4.13<sup>62</sup>. Somatic hypermutation (SHM) frequency was calculated for each heavy chain  
746 sequence using SHazaM v.1.0.2<sup>60</sup> as previously described<sup>24</sup> by counting the number of  
747 nucleotide mismatches from the germline sequence in the variable segment leading up to the  
748 CDR3, while excluding the first 18 positions that could be error-prone due to the primers used  
749 for generating the mAb sequences.

750 **Processing of 10x Genomics single-cell 5' gene expression data.** Demultiplexed pair-  
751 end FASTQ reads were first preprocessed on a by-sample basis and samples were subsequently  
752 subsampled to the same effective sequencing length and aggregated using Cell Ranger v.6.0.1 as  
753 previously described<sup>24</sup>. Quality control was performed on the aggregate gene expression matrix  
754 consisting of 336,960 cells and 36,601 features using SCANPY v.1.7.2<sup>62</sup>. Briefly, to remove

755 presumably lysed cells, cells with mitochondrial content greater than 17.5% of all transcripts  
756 were removed. To remove likely doublets, cells with more than 8,000 features or 80,000 total  
757 UMIs were removed. To remove cells with no detectable expression of common endogenous  
758 genes, cells with no transcript for any of a list of 34 housekeeping genes<sup>24</sup> were removed. The  
759 feature matrix was subset, based on their biotypes, to protein-coding, immunoglobulin, and T  
760 cell receptor genes that were expressed in at least 0.05% of the cells in any sample. The resultant  
761 feature matrix contained 15,751 genes. Finally, cells with detectable expression of fewer than  
762 200 genes were removed. After quality control, there were a total of 312,242 cells from 39  
763 single-cell samples (**Extended Data Table 4**).

764 **Single-cell gene expression analysis.** Transcriptomic data was analyzed using SCANPY  
765 v.1.7.2<sup>62</sup> as previously described<sup>24</sup> with minor adjustments suitable for the current data. Briefly,  
766 overall clusters were first identified using Leiden graph-clustering with resolution 0.50  
767 (**Extended Data Fig. 3B, Extended Data Table 5**). UMAPs were faceted by participant and  
768 inspected for convergence to assess whether there was a need for integration (**Extended Data**  
769 **Fig. 3C**). Cluster identities were assigned by examining the expression of a set of marker genes<sup>63</sup>  
770 for different cell types (**Extended Data Fig. 3D**). To remove potential contamination by  
771 platelets, 205 cells with a log-normalized expression value of >2.5 for PPBP were removed.  
772 From a cluster consisting primarily of monocytes, 36 cells originating from LN FNA and with a  
773 log-normalized expression value of >0 for at least two of FDCSP, CXCL14<sup>64</sup>, and FCAMR<sup>65</sup>  
774 were annotated FDCs. Cells from the overall B cell cluster were further clustered to identify B  
775 cell subsets using Leiden graph-clustering resolution 0.35 (**Extended Data Fig. 3E, Extended**  
776 **Data Table 6**). Cluster identities were assigned by examining the expression of a set of marker  
777 genes<sup>63</sup> for different B cell subsets (**Extended Data Fig. 3F**) along with the availability of

778 BCRs. Despite being clustered with B cells during overall clustering, one group tended to have  
779 both BCRs and relatively high expression levels of CD2 and CD3E; one group tended to have no  
780 BCRs and relatively high CD2 and CD3E; and two unassigned groups tended to have no BCRs.  
781 These were excluded from the final B cell clustering. Ten cells that were found in the GC B cell  
782 cluster but came from blood were labelled 'PB-like'<sup>63</sup>. 407 cells that were found in the PB  
783 cluster but came from LN FNA were re-assigned as LNPCs. One cell that was found in the  
784 LNPC cluster but came from blood was re-assigned as PB. Heavy chain SHM frequency and  
785 isotype usage of the B cell subsets were inspected for consistency with expected values to further  
786 confirm their assigned identities.  
787

788 **Figure captions**

789 **Figure 1. B cell response to mRNA-1273 and mRNA-1273.213 booster immunizations. (a)**

790 Study design. Seven and thirty-nine healthy adult volunteers were enrolled and received an  
791 mRNA-1273 or mRNA-1273.213 booster, respectively. Blood was collected at baseline and at 1,  
792 2, 4, 8, 17, and 26 weeks post-boost. Fine needle aspirates (FNAs) of ipsilateral axillary lymph  
793 nodes were collected 2 and 8 weeks post-boost from 5 and 20 participants, and bone marrow  
794 aspirates were collected from 3 and 11 participants 26 weeks post-boost in the mRNA-1273 and  
795 mRNA-1273.213 cohorts, respectively. **(b)** Frequencies of S-binding IgG-producing  
796 plasmablasts (PB) in PBMC 1 week post-boost measured by enzyme-linked immunosorbent spot  
797 (ELISpot) in participants who received mRNA-1273 (left) and mRNA-1273.213 (right). **(c)**  
798 Representative flow cytometry plots of BCL6 and CD38 staining of streptavidin (SA)<sup>-</sup> IgD<sup>lo</sup>  
799 CD19<sup>+</sup> CD3<sup>-</sup> live singlet lymphocytes in FNA samples (left), pooled (WA1/2020, 1.351,  
800 1.617.2, and 1.1.529 all on BV421 and BV650) S probe staining on BCL6<sup>+</sup>CD38<sup>int</sup> GC B cells  
801 (left center), and frequencies of S<sup>+</sup> GC B cells from FNA of draining lymph nodes from  
802 participants who received mRNA-1273 (right center) and mRNA-1273.213 (right). **(d)**  
803 Representative flow cytometry plots of CD20 and CD38 staining of SA<sup>-</sup> IgD<sup>lo</sup> CD19<sup>+</sup> CD3<sup>-</sup> live  
804 singlet lymphocytes in PBMC (left), pooled S probe staining on CD20<sup>+</sup>CD38<sup>lo/int</sup> B cells (left  
805 center), and frequencies of S<sup>+</sup> memory B cells (MBCs) from PBMC 17 weeks post-boost in  
806 participants who received mRNA-1273 (right center) and mRNA-1273.213 (right). **(e)**  
807 Representative ELISpot wells coated with the indicated antigens, and developed in blue (IgG)  
808 and red (IgA) after plating the indicated numbers of bone marrow plasma cells (BMPCs). **(f)**  
809 Frequencies of IgG-secreting BMPCs specific for the indicated antigens 26 weeks post-boost in  
810 participants who received mRNA-1273 (left) and mRNA-1273.213 (right). Black lines indicate

811 medians. Symbols at each time point represent one sample. For mRNA-1273 and mRNA-  
812 1273.213 respectively, n = 7 and 38 (b), n = 5 and 20 (c), n = 6 and 28 (d), n = 3 and 10 (f). (g, i)  
813 Binding of mAbs from S<sup>+</sup> MBCs 17 weeks post-boost from participants who received mRNA-  
814 1273 (g) and mRNA-1273.213 (i) to indicated strains of SARS-CoV-2 S measured by multiplex  
815 bead binding array. (h, j) Summary of mAb cross-reactivity from participants who received  
816 mRNA-1273 (h) and mRNA-1273.213 (j).

817

818 **Figure 2. Maturation of S<sup>+</sup> MBCs and BMPCs in response to mRNA-1273 or 1273.213**

819 **booster immunizations.** (a, b, e) Uniform manifold approximation and projection (UMAP) of  
820 scRNA-seq transcriptional clusters of B cells either from sorted circulating PBs 1 week post  
821 boost with log-normalised *XBPI* gene expression (a) and S-specific clones (b) overlaid, or from  
822 FNAs of draining lymph nodes with S-specific clones overlaid (e). Each dot represents a cell. (c)  
823 Clonal overlap and percentages of S-specific PB clones related to clones generated during the  
824 primary vaccine response among participants receiving mRNA-1273 (upper) and mRNA-  
825 1273.213 (lower). Arc length corresponds to the number of B cell receptor sequences and chord  
826 width corresponds to clone size. Purple chords correspond to overlapping clones. Percentages are  
827 of PB clones related to pre-boost S-specific clones. (d, f, g) Paired median immunoglobulin  
828 heavy chain variable region gene (*IGHV*) mutation frequencies of S-specific clones found in PB  
829 both 1 week after the 2<sup>nd</sup> dose of the primary vaccine series and boost (d), MBCs identified both  
830 6 months after primary vaccination and 17 weeks after boost (f), and BMPCs identified both 6  
831 and/or 9 months after primary vaccination and 6 months after boost (g). Each symbol represents  
832 the median mutation frequency of a clone; horizontal lines indicate medians. For mRNA-1273

833 and mRNA-1273.213 respectively,  $n = 52$  and  $104$  (d),  $n = 44$  and  $41$  (f),  $n = 7$  and  $16$  (g).  $P$   
834 values from two-sided Wilcoxon test.

835

836 **Figure 3. Neutralization capacity of MBC-derived mAbs.** (a) Frequencies of S-binding IgG-  
837 producing plasmablasts (PB) in PBMC 1 week post-boost measured by ELISpot in participants  
838 who received mRNA-1273.529. Horizontal lines indicate medians. Each symbol represents 1  
839 sample,  $n = 7$ . (b) Binding of mAbs from  $S^+$  MBCs 17 weeks post-boost to indicated strains of  
840 SARS-CoV-2 S measured by multiplex bead binding array. (c) Summary of mAb cross-  
841 reactivity. (d) Neutralizing activity of mAbs from week 17  $S^+$  MBCs against indicated strains of  
842 authentic SARS-CoV-2 virus from participants who received indicated booster vaccines. Each  
843 symbol represents an individual mAb,  $n = 39$  for mRNA-1273,  $n = 49$  for mRNA-1273.213, and  
844  $n = 52$  for mRNA-1273.529. Percentages are of mAbs below the 90% infection reduction  
845 threshold.  $P$  values from chi-squared tests between vaccine cohorts.

846

847 **Figure 4. Characterization of BA.1-specific mAbs.** (a) Gating strategy for sorting  $BA.1^+$   
848  $WA1/2020^-$  MBC from 17 weeks post-boost PBMC. (b) Binding of mAbs from  $BA.1^+$   
849  $WA1/2020^-$  sorted MBCs to indicated strains of SARS-CoV-2 S measured by multiplex bead  
850 binding array. (c) Summary of mAb binding. (d) Neutralizing activity of  $BA.1^+$   $WA1/2020^-$   
851 binding mAbs against indicated strains of authentic SARS-CoV-2 virus. Numbers above each  
852 virus are of mAbs below the 90% infection reduction threshold. (e) IGHV mutation frequencies  
853 of clones related to mAbs from participants 382-54 and 382-55 that neutralized D164G (left) and  
854  $BA.1$  but not D614G (right). Black lines indicate medians. Each symbol represents a sequence;  $n$   
855  $= 39$  for  $D614G^+$  and  $n = 7$  for  $BA.1^+$   $D614G^-$ . (f) Plaque assays on Vero E6 cells with indicated

856 mAb in the overlay to isolate escape mutants (red arrows). Images are representative of three  
857 experiments per mAb. (g) Structure of RBD with hACE2 footprint highlighted in brown, BA.1  
858 mutations highlighted in blue, and amino acids whose substitution confers resistance to indicated  
859 mAbs in plaque assays highlighted in red.

860

#### 861 **Extended Data figure captions**

#### 862 **Extended Data Figure 1. Robust GC and Tfh responses to mRNA-1273 and mRNA-** 863 **1273.213 boosters.**

864 (a) Frequencies of S-binding IgA-producing PB in PBMC 1 week post-boost measured by  
865 ELISpot in participants who received mRNA-1273 (left) and mRNA-1273.213 (right). (b)  
866 Plasma IgG binding to indicated strains of SARS-CoV-2 S measured by multiplex bead binding  
867 array in participants who received mRNA-1273 (upper) and mRNA-1273.213 (lower). (c) Gating  
868 strategy for analyzing S<sup>+</sup> GC B cells and Tfh in FNA. (d) Frequencies of T follicular helper cells  
869 (Tfh) from FNA of draining lymph nodes. (e) Correlation between frequencies of S<sup>+</sup> GC B cells  
870 and Tfh. (f) Representative ELISpot wells coated with BSA, and developed in blue (IgG) and red  
871 (IgA) after plating the indicated numbers of BMPCs. (g) Frequencies of IgA-secreting BMPCs  
872 specific for the indicated antigens 26 weeks post-boost. Black lines indicate medians. Symbols at  
873 each time point represent one sample. For mRNA-1273 and mRNA-1273.213 respectively, n = 7  
874 and 38 (a), n = 6 and 28 (b), n = 5 and 20 (d), n = 3 and 10 (g).

875

#### 876 **Extended Data Figure 2. Breadth of MBC-derived mAbs after mRNA-1273 and mRNA-** 877 **1273.213 boosters.**

878 (a) Gating strategy for sorting S<sup>+</sup> MBC from PBMC. (b) Binding of mAbs to indicated antigens  
879 by ELISA performed in duplicate, presented as OD<sub>490</sub> minus two times the background signal to  
880 BSA.

881

882 **Extended Data Figure 3. Maturation of S<sup>+</sup> MBCs in response to mRNA-1273 or mRNA-**  
883 **1273.213 booster.**

884 (a) Gating strategy for sorting PB from PBMC. (b, c, e, g) UMAPs showing scRNA-seq  
885 transcriptional clusters of total cells (b, c) or B cells (e, g) from all participants (b, e) or from  
886 each participant separately (c, g). (d, f) Dot plots for the marker genes used for identifying the  
887 annotated clusters in (b, c) (d) and in (e, g) (f). (h) SARS-CoV-2 S<sup>+</sup> clones visualized in red on  
888 UMAPs of B cells from each participant separately and faceted by time point. (i) Clonal overlap  
889 between S-binding PBs and GC B cells at indicated time points. Arc length corresponds to the  
890 number of BCR sequences and chord width corresponds to clone size. Purple chords correspond  
891 to clones spanning both compartments. Percentages are of GC B cell clones related to PBs at  
892 each time point. (j) Percentages of S-specific GC clones related to week 1 PBs. Symbols at each  
893 time point represent one sample, n = 6. (k) Representative flow cytometry plots of WA1/2020  
894 and B.1.351 (left) or B.1.617.2 (right) staining of SA<sup>-</sup> BCL6<sup>+</sup>CD38<sup>int</sup> IgD<sup>lo</sup> CD19<sup>+</sup> CD3<sup>-</sup> live  
895 singlet lymphocytes (top) or SA<sup>-</sup> CD20<sup>+</sup>CD38<sup>lo</sup> IgD<sup>lo</sup> CD19<sup>+</sup> CD3<sup>-</sup> live singlet lymphocytes  
896 (bottom) in FNA samples from participants who received mRNA-1273.213. (l) Frequencies of  
897 B.1.351<sup>+</sup> WA1/2020<sup>-</sup> and B.1.617.2<sup>+</sup> WA1/2020<sup>-</sup> GC B cells (left) and MBC (right) from FNA  
898 of draining lymph nodes from participants who received mRNA-1273.213. Black lines indicate  
899 medians. Symbols represent one sample; n = 9.

900



901 **Extended Data Figure 4. Characterization of BA.1-specific mAbs.**

902 **(a)** Frequencies of S-binding IgA-producing PB in PBMC 1 week post-boost measured by  
903 ELISpot in participants who received mRNA-1273.529. Black lines indicate medians. Symbols  
904 represent one sample; n = 7. **(b)** Neutralizing activity of mAbs from week 17 S<sup>+</sup> MBCs against  
905 chimeric vesicular stomatitis virus in which the native envelope glycoprotein was replaced with  
906 S from WA1/2020 (with D614G mutation). **(c)** Binding of mAbs to BA.1 S and its constituent  
907 domains by ELISA performed in duplicate, presented as OD<sub>490</sub> values. S2-specific mAb 368-22  
908 1B08 was described previously<sup>54</sup>. **(d)** Titration of mAbs to determine neutralizing concentrations  
909 against VSV-SARS-CoV-2. Data are representative of two independent experiments.

910 **Extended Data Tables**

911 **Extended Data Table 1. Study WU382 participant demographics**

| <b>Variable</b>                                                      | <b>Total n=54<br/>n (%)</b> |
|----------------------------------------------------------------------|-----------------------------|
| <b>Age (median [range])</b>                                          | 37.5 (18-72)                |
| <b>Sex</b>                                                           |                             |
| Female                                                               | 31 (57.4)                   |
| Male                                                                 | 23 (42.6)                   |
| <b>Race</b>                                                          |                             |
| White                                                                | 49 (90.7)                   |
| Black                                                                | 2 (3.7)                     |
| Asian                                                                | 2 (3.7)                     |
| Other                                                                | 1 (1.9)                     |
| <b>Ethnicity</b>                                                     |                             |
| Not of Hispanic, Latinx, or Spanish origin                           | 52 (96.3)                   |
| Hispanic, Latinx, Spanish origin                                     | 2 (3.7)                     |
| <b>BMI (median [range])</b>                                          | 26.86 (19.3-47.74)          |
| <b>Comorbidities</b>                                                 |                             |
| Lung disease                                                         | 1 (1.9)                     |
| Diabetes mellitus                                                    | 1 (1.9)                     |
| Hypertension                                                         | 10 (18.5)                   |
| Cardiovascular                                                       | 0 (0)                       |
| Liver disease                                                        | 0 (0)                       |
| Chronic kidney disease                                               | 0 (0)                       |
| Cancer on chemotherapy                                               | 0 (0)                       |
| Hematological malignancy                                             | 0 (0)                       |
| Pregnancy                                                            | 0 (0)                       |
| Neurological                                                         | 0 (0)                       |
| Rheumatologic disease                                                | 0 (0)                       |
| HIV                                                                  | 0 (0)                       |
| Solid organ transplant recipient                                     | 0 (0)                       |
| Bone marrow transplant recipient                                     | 0 (0)                       |
| Hyperlipidemia                                                       | 2 (3.7)                     |
| <b>Type of baseline vaccine</b>                                      |                             |
| Pfizer                                                               | 29 (53.7)                   |
| Moderna                                                              | 25 (46.3)                   |
| <b>Type of booster vaccine (1<sup>st</sup> booster)</b>              |                             |
| Moderna mRNA-1273                                                    | 12 (22.2)                   |
| Moderna mRNA-1273.213                                                | 39 (72.2)                   |
| Moderna mRNA-1273.529                                                | 3 (6)                       |
| <b>Time from second dose to booster in days<br/>(median [range])</b> | 272.5 (196-356)             |
| <b>Participants who received 2<sup>nd</sup> booster</b>              | <b>5 (9)</b>                |
| Moderna 1273.529                                                     | 5 (9)                       |

913 **Extended Data Table 2. Booster vaccine side effects<sup>a</sup>**

| <b>Side effects from booster vaccines</b> | <b>Overall (n=54)</b> | <b>mRNA-1273.213 (n=39)</b> | <b>mRNA-1273.529 (n=3)</b> | <b>mRNA-1273 (n=12)</b> |
|-------------------------------------------|-----------------------|-----------------------------|----------------------------|-------------------------|
| Chills                                    | 24 (44.4)             | 21 (53.8)                   | 0 (0)                      | 2 (28.6)                |
| Feeling unwell                            | 29 (53.7)             | 25 (64.1)                   | 1 (33.3)                   | 3 (25)                  |
| Fever                                     | 15 (27.8)             | 14 (35.9)                   | 0 (0)                      | 1 (14.3)                |
| Headache                                  | 25 (46.3)             | 20 (51.3)                   | 1 (33.3)                   | 1 (14.3)                |
| Injection site pain                       | 40 (74.1)             | 29 (74.4)                   | 1 (33.3)                   | 6 (85.7)                |
| Injection site swelling                   | 5 (9.3)               | 5 (12.8)                    | 0 (0)                      | 0 (0)                   |
| Injection site redness                    | 7 (13)                | 6 (15.4)                    | 0 (0)                      | 1 (8.3)                 |
| Joint pain                                | 13 (24.1)             | 10 (25.6)                   | 0 (0)                      | 3 (25)                  |
| Muscle pain                               | 24 (44.4)             | 19 (48.7)                   | 1 (33.3)                   | 4 (33.3)                |
| Nausea                                    | 10 (18.5)             | 8 (20.5)                    | 1 (33.3)                   | 1 (8.3)                 |
| Swollen lymph nodes                       | 14 (25.9)             | 10 (25.6)                   | 0 (0)                      | 4 (25.6)                |
| Tiredness                                 | 36 (66.7)             | 27 (69.2)                   | 1 (33.3)                   | 8 (66.7)                |

914

915 <sup>a</sup>These data are reported for a subset of the participants enrolled in a parallel clinical trial

916 (NCT04927065) who provided additional consent for the collection of samples in this study.

917 Safety and reactogenicity data for all participants in the clinical trial will be reported separately.

918 **Extended Data Table 3. Processing of BCR reads from bulk-seq**

| Participant | Timepoint<br>(post-3 <sup>rd</sup><br>dose) | Tissue | Sorting | Cell<br>Count | Sequence Count |                       |                                          |                               |
|-------------|---------------------------------------------|--------|---------|---------------|----------------|-----------------------|------------------------------------------|-------------------------------|
|             |                                             |        |         |               | Input<br>Reads | Preprocessed<br>Reads | Post-QC<br>Productive<br>Heavy<br>Chains | Unique<br>Heavy Chain<br>VDJs |
| 382-01      | Week 17                                     | Blood  | IgDlo   | 111946        | 1583322        | 44815                 | 38187                                    | 17282                         |
| 382-01      | Week 26                                     | BM     | BMPC    | 100000        | 1758531        | 108513                | 98986                                    | 56058                         |
| 382-02      | Week 17                                     | Blood  | IgDlo   | 117796        | 1814249        | 31690                 | 27361                                    | 14377                         |
| 382-02      | Week 26                                     | BM     | BMPC    | 500000        | 1753509        | 92329                 | 79291                                    | 35369                         |
| 382-07      | Week 17                                     | Blood  | IgDlo   | 40722         | 1472130        | 7494                  | 6028                                     | 4180                          |
| 382-07      | Week 26                                     | BM     | BMPC    | 100000        | 931929         | 44883                 | 40802                                    | 20350                         |
| 382-08      | Week 17                                     | Blood  | IgDlo   | 225941        | 1640142        | 38798                 | 33787                                    | 19143                         |
| 382-08      | Week 26                                     | BM     | BMPC    | 500000        | 1413927        | 76177                 | 68170                                    | 39745                         |
| 382-13      | Week 2                                      | LN     | GC B    | 1457          | 391576         | 120                   | 81                                       | 48                            |
| 382-13      | Week 2                                      | LN     | LNPC    | 510           | 1177974        | 639                   | 456                                      | 247                           |
| 382-13      | Week 8                                      | LN     | GC B    | 361           | 845333         | 54                    | 28                                       | 23                            |
| 382-13      | Week 8                                      | LN     | LNPC    | 75            | 762774         | 144                   | 101                                      | 50                            |
| 382-13      | Week 17                                     | Blood  | IgDlo   | 100067        | 1883825        | 28252                 | 24250                                    | 13743                         |
| 382-13      | Week 26                                     | BM     | BMPC    | 500000        | 833430         | 34145                 | 31654                                    | 23740                         |
| 382-15      | Week 2                                      | LN     | GC B    | 10851         | 1092056        | 843                   | 539                                      | 393                           |
| 382-15      | Week 2                                      | LN     | LNPC    | 1261          | 1443988        | 3062                  | 2300                                     | 833                           |
| 382-15      | Week 8                                      | LN     | GC B    | 8218          | 1123859        | 699                   | 452                                      | 294                           |
| 382-15      | Week 8                                      | LN     | LNPC    | 2943          | 1457122        | 3496                  | 2419                                     | 1178                          |
| 382-15      | Week 17                                     | Blood  | IgDlo   | 192652        | 927478         | 30426                 | 26818                                    | 16746                         |
| 382-15      | Week 26                                     | BM     | BMPC    | 440000        | 960553         | 48008                 | 44795                                    | 28188                         |
| 382-53      | Week 17                                     | Blood  | IgDlo   | 219910        | 1273447        | 65305                 | 50662                                    | 19066                         |
| 382-54      | Week 1                                      | Blood  | PB      | 14107         | 1359995        | 32452                 | 28136                                    | 9899                          |
| 382-54      | Week 8                                      | LN     | GC B    | 420           | 1796016        | 154                   | 73                                       | 41                            |
| 382-54      | Week 8                                      | LN     | LNPC    | 97            | 890863         | 281                   | 207                                      | 103                           |
| 382-54      | Week 17                                     | Blood  | IgDlo   | 119119        | 1406118        | 58308                 | 48507                                    | 18553                         |
| 382-55      | Week 1                                      | Blood  | PB      | 28596         | 1498648        | 57378                 | 49948                                    | 19062                         |
| 382-55      | Week 17                                     | Blood  | IgDlo   | 97942         | 1586896        | 50695                 | 42233                                    | 19154                         |

920 **Extended Data Table 4. Processing of BCR and 5' gene expression data from scRNA-seq**

| Participant | Timepoint<br>(post-3 <sup>rd</sup> dose<br>unless noted) | Tissue | Sorting | Replicate | BCR                          |                               | 5' Gene Expression           |                               |                                      |                                       |
|-------------|----------------------------------------------------------|--------|---------|-----------|------------------------------|-------------------------------|------------------------------|-------------------------------|--------------------------------------|---------------------------------------|
|             |                                                          |        |         |           | Pre-QC<br>number<br>of cells | Post-QC<br>number<br>of cells | Pre-QC<br>number<br>of cells | Post-QC<br>number<br>of cells | Median<br>number of<br>UMIs per cell | Median<br>number of<br>genes per cell |
| 382-01      | Post-2 <sup>nd</sup> dose<br>Week 26                     | Blood  | IgDlo   | 1         | 10056                        | 7702                          | 10574                        | 10491                         | 3523                                 | 1364                                  |
| 382-01      | Post-2 <sup>nd</sup> dose<br>Week 26                     | Blood  | IgDlo   | 2         | 9590                         | 7400                          | 10020                        | 9946                          | 3568.5                               | 1369                                  |
| 382-01      | Week 1                                                   | Blood  | PB      | 1         | 3582                         | 2939                          | 3829                         | 3004                          | 6819                                 | 1605                                  |
| 382-01      | Week 2                                                   | LN     | NS      | 1         | 2974                         | 2704                          | 7235                         | 6725                          | 3006                                 | 1214                                  |
| 382-01      | Week 2                                                   | LN     | NS      | 2         | 3275                         | 2962                          | 7595                         | 7138                          | 3093                                 | 1240                                  |
| 382-01      | Week 2                                                   | LN     | NS      | 3         | 3158                         | 2821                          | 7553                         | 7013                          | 3066                                 | 1220                                  |
| 382-01      | Week 2                                                   | LN     | NS      | 4         | 3132                         | 2770                          | 7111                         | 6594                          | 3096                                 | 1227                                  |
| 382-01      | Week 8                                                   | LN     | NS      | 1         | 2445                         | 2265                          | 7753                         | 7468                          | 3124.5                               | 1276                                  |
| 382-01      | Week 8                                                   | LN     | NS      | 2         | 2295                         | 2109                          | 7469                         | 7160                          | 3152                                 | 1299                                  |
| 382-01      | Week 8                                                   | LN     | NS      | 3         | 2331                         | 2130                          | 7835                         | 7542                          | 3144                                 | 1293.5                                |
| 382-01      | Week 8                                                   | LN     | NS      | 4         | 2545                         | 2283                          | 8039                         | 7744                          | 3067                                 | 1247                                  |
| 382-02      | Week 1                                                   | Blood  | PB      | 1         | 2560                         | 2077                          | 2588                         | 2189                          | 6548                                 | 1511                                  |
| 382-02      | Week 2                                                   | LN     | NS      | 1         | 1615                         | 1523                          | 8901                         | 8172                          | 3541                                 | 1394                                  |
| 382-02      | Week 8                                                   | LN     | NS      | 1         | 5863                         | 4915                          | 8689                         | 8271                          | 3546                                 | 1396                                  |
| 382-02      | Week 8                                                   | LN     | NS      | 2         | 5241                         | 4548                          | 8895                         | 8430                          | 3514                                 | 1392                                  |
| 382-07      | Week 1                                                   | Blood  | PB      | 1         | 3104                         | 2177                          | 2437                         | 1764                          | 6987.5                               | 1521                                  |
| 382-07      | Week 2                                                   | LN     | NS      | 1         | 2234                         | 2108                          | 8886                         | 8353                          | 3326                                 | 1345                                  |
| 382-07      | Week 8                                                   | LN     | NS      | 1         | 2774                         | 2590                          | 9967                         | 9314                          | 3365.5                               | 1438                                  |
| 382-07      | Week 8                                                   | LN     | NS      | 2         | 2656                         | 2473                          | 9691                         | 9002                          | 3382                                 | 1443                                  |
| 382-08      | Post-2 <sup>nd</sup> dose<br>Week 26                     | Blood  | IgDlo   | 1         | 13540                        | 11447                         | 13727                        | 13680                         | 3355.5                               | 1319                                  |
| 382-08      | Post-2 <sup>nd</sup> dose<br>Week 26                     | Blood  | IgDlo   | 2         | 13224                        | 11278                         | 13538                        | 13478                         | 3423                                 | 1345                                  |
| 382-08      | Week 1                                                   | Blood  | PB      | 1         | 10513                        | 7295                          | 9029                         | 8331                          | 821                                  | 368                                   |
| 382-08      | Week 1                                                   | Blood  | PB      | 2         | 2347                         | 1008                          | 725                          | 512                           | 7148.5                               | 1593.5                                |
| 382-08      | Week 2                                                   | LN     | NS      | 1         | 1704                         | 1566                          | 6509                         | 6232                          | 3288                                 | 1313                                  |
| 382-08      | Week 2                                                   | LN     | NS      | 2         | 1686                         | 1551                          | 6302                         | 6003                          | 3292                                 | 1295                                  |
| 382-08      | Week 8                                                   | LN     | NS      | 1         | 942                          | 865                           | 7714                         | 6784                          | 3369                                 | 1497                                  |
| 382-08      | Week 8                                                   | LN     | NS      | 2         | 908                          | 852                           | 7915                         | 6988                          | 3355                                 | 1482                                  |
| 382-13      | Post-2 <sup>nd</sup> dose<br>Week 26                     | Blood  | IgDlo   | 1         | 9246                         | 7601                          | 9534                         | 9483                          | 3314                                 | 1283                                  |
| 382-13      | Post-2 <sup>nd</sup> dose<br>Week 26                     | Blood  | IgDlo   | 2         | 8557                         | 7183                          | 8737                         | 8674                          | 3628                                 | 1350                                  |
| 382-13      | Week 1                                                   | Blood  | PB      | 1         | 3755                         | 3124                          | 3945                         | 3377                          | 6256                                 | 1540                                  |
| 382-13      | Week 2                                                   | LN     | NS      | 1         | 1481                         | 1378                          | 5735                         | 4801                          | 3048                                 | 1341                                  |
| 382-13      | Week 2                                                   | LN     | NS      | 2         | 1527                         | 1390                          | 6257                         | 5288                          | 2911.5                               | 1294                                  |
| 382-13      | Week 8                                                   | LN     | NS      | 1         | 3955                         | 3697                          | 16565                        | 15153                         | 3263                                 | 1433                                  |
| 382-13      | Week 8                                                   | LN     | NS      | 2         | 4002                         | 3740                          | 15887                        | 14582                         | 3247                                 | 1440                                  |
| 382-15      | Week 1                                                   | Blood  | PB      | 1         | 4999                         | 2755                          | 948                          | 695                           | 6055                                 | 1489                                  |
| 382-15      | Week 2                                                   | LN     | NS      | 1         | 4516                         | 4130                          | 10731                        | 8792                          | 3267                                 | 1437.5                                |
| 382-15      | Week 2                                                   | LN     | NS      | 2         | 4440                         | 4060                          | 10589                        | 8680                          | 3327                                 | 1452                                  |
| 382-15      | Week 8                                                   | LN     | NS      | 1         | 14533                        | 11681                         | 24234                        | 23756                         | 1684                                 | 974                                   |
| 382-15      | Week 8                                                   | LN     | NS      | 2         | 5135                         | 4568                          | 13272                        | 10633                         | 3174                                 | 1367                                  |

921 **Extended Data Table 5. Cell counts and frequencies of overall transcriptional clusters from**  
922 **scRNA-seq**

| Participant | Transcriptional Cluster |                |              |             |             |             |         |
|-------------|-------------------------|----------------|--------------|-------------|-------------|-------------|---------|
|             | B                       | CD4+ T         | CD8+ T       | NK          | Monocyte    | pDC         | FDC     |
| 382-01      | 43604 (54.1%)           | 27552 (34.2%)  | 6663 (8.3%)  | 1114 (1.4%) | 1260 (1.6%) | 452 (0.6%)  | 6 (0%)  |
| 382-02      | 8722 (32.2%)            | 14566 (53.9%)  | 2796 (10.3%) | 249 (0.9%)  | 546 (2%)    | 155 (0.6%)  | 11 (0%) |
| 382-07      | 8982 (31.6%)            | 15493 (54.5%)  | 2645 (9.3%)  | 566 (2%)    | 494 (1.7%)  | 246 (0.9%)  | 5 (0%)  |
| 382-08      | 40884 (65.9%)           | 15078 (24.3%)  | 4685 (7.6%)  | 652 (1.1%)  | 432 (0.7%)  | 266 (0.4%)  | 1 (0%)  |
| 382-13      | 31918 (52%)             | 22362 (36.4%)  | 5976 (9.7%)  | 507 (0.8%)  | 485 (0.8%)  | 107 (0.2%)  | 1 (0%)  |
| 382-15      | 34299 (65.3%)           | 13031 (24.8%)  | 3466 (6.6%)  | 972 (1.8%)  | 633 (1.2%)  | 143 (0.3%)  | 12 (0%) |
| Combined    | 168409 (54%)            | 108082 (34.6%) | 26231 (8.4%) | 4060 (1.3%) | 3850 (1.2%) | 1369 (0.4%) | 36 (0%) |

923

924 **Extended Data Table 6. Cell counts and frequencies of B cell transcriptional clusters from**

925 **scRNA-seq**

| Participant | Timepoint<br>(post-3 <sup>rd</sup> dose<br>unless noted) | B cell transcriptional cluster |             |                  |          |            |                  |               |
|-------------|----------------------------------------------------------|--------------------------------|-------------|------------------|----------|------------|------------------|---------------|
|             |                                                          | GC                             | LNPC        | PB               | PB-like  | ABC        | Naive            | MBC           |
| 382-01      | Post-2nd dose<br>week 26                                 | 0 (0%)                         | 0 (0%)      | 0 (0%)           | 1 (0%)   | 470 (2.3%) | 96 (0.5%)        | 19674 (97.2%) |
| 382-01      | Week 1                                                   | 0 (0%)                         | 0 (0%)      | 2600 (99.4%)     | 0 (0%)   | 0 (0%)     | 3 (0.1%)         | 13 (0.5%)     |
| 382-01      | Week 2                                                   | 1184 (11.1%)                   | 269 (2.5%)  | 0 (0%)           | 0 (0%)   | 9 (0.1%)   | 3619 (34%)       | 5569 (52.3%)  |
| 382-01      | Week 8                                                   | 1228 (14.5%)                   | 226 (2.7%)  | 0 (0%)           | 0 (0%)   | 0 (0%)     | 1848 (21.7%)     | 5195 (61.1%)  |
| 382-01      | Combined                                                 | 2412 (5.7%)                    | 495 (1.2%)  | 2600 (6.2%)      | 1 (0%)   | 479 (1.1%) | 5566 (13.3%)     | 30451 (72.5%) |
| 382-02      | Week 1                                                   | 0 (0%)                         | 0 (0%)      | 1805 (99.1%)     | 1 (0.1%) | 0 (0%)     | 6 (0.3%)         | 10 (0.5%)     |
| 382-02      | Week 2                                                   | 68 (4.9%)                      | 19 (1.4%)   | 0 (0%)           | 0 (0%)   | 0 (0%)     | 720 (51.6%)      | 588 (42.2%)   |
| 382-02      | Week 8                                                   | 364 (7.5%)                     | 52 (1.1%)   | 0 (0%)           | 0 (0%)   | 0 (0%)     | 1639 (33.6%)     | 2830 (57.9%)  |
| 382-02      | Combined                                                 | 432 (5.3%)                     | 71 (0.9%)   | 1805 (22.3%)     | 1 (0%)   | 0 (0%)     | 2365 (29.2%)     | 3428 (42.3%)  |
| 382-07      | Week 1                                                   | 0 (0%)                         | 0 (0%)      | 1438 (98.9%)     | 0 (0%)   | 1 (0.1%)   | 4 (0.3%)         | 11 (0.8%)     |
| 382-07      | Week 2                                                   | 81 (4.1%)                      | 68 (3.5%)   | 0 (0%)           | 0 (0%)   | 1 (0.1%)   | 943 (48%)        | 871 (44.3%)   |
| 382-07      | Week 8                                                   | 425 (8.8%)                     | 69 (1.4%)   | 0 (0%)           | 0 (0%)   | 0 (0%)     | 1403 (29.1%)     | 2917 (60.6%)  |
| 382-07      | Combined                                                 | 506 (6.1%)                     | 137 (1.7%)  | 1438 (17.5%)     | 0 (0%)   | 2 (0%)     | 2350 (28.5%)     | 3799 (46.1%)  |
| 382-08      | Post-2nd dose<br>week 26                                 | 0 (0%)                         | 0 (0%)      | 0 (0%)           | 1 (0%)   | 297 (1.1%) | 246 (0.9%)       | 26601 (98%)   |
| 382-08      | Week 1                                                   | 0 (0%)                         | 0 (0%)      | 8771 (99.7%)     | 1 (0%)   | 0 (0%)     | 0 (0%)           | 29 (0.3%)     |
| 382-08      | Week 2                                                   | 157 (5.7%)                     | 75 (2.7%)   | 0 (0%)           | 0 (0%)   | 3 (0.1%)   | 1281 (46.6%)     | 1235 (44.9%)  |
| 382-08      | Week 8                                                   | 161 (9.6%)                     | 57 (3.4%)   | 0 (0%)           | 0 (0%)   | 0 (0%)     | 739 (44.2%)      | 715 (42.8%)   |
| 382-08      | Combined                                                 | 318 (0.8%)                     | 132 (0.3%)  | 8771 (21.7%)     | 2 (0%)   | 300 (0.7%) | 2266 (5.6%)      | 28580 (70.8%) |
| 382-13      | Post-2nd dose<br>week 26                                 | 0 (0%)                         | 0 (0%)      | 7 (0%)           | 2 (0%)   | 45 (0.2%)  | 109 (0.6%)       | 17940 (99.1%) |
| 382-13      | Week 1                                                   | 0 (0%)                         | 0 (0%)      | 2714 (98.7%)     | 3 (0.1%) | 0 (0%)     | 9 (0.3%)         | 23 (0.8%)     |
| 382-13      | Week 2                                                   | 913 (31.4%)                    | 339 (11.7%) | 0 (0%)           | 0 (0%)   | 0 (0%)     | 877 (30.2%)      | 777 (26.7%)   |
| 382-13      | Week 8                                                   | 873 (13.6%)                    | 116 (1.8%)  | 0 (0%)           | 0 (0%)   | 0 (0%)     | 2478 (38.5%)     | 2968 (46.1%)  |
| 382-13      | Combined                                                 | 1786 (5.9%)                    | 455 (1.5%)  | 2721 (9.0%)      | 5 (0%)   | 45 (0.1%)  | 3473 (11.5%)     | 21708 (71.9%) |
| 382-15      | Week 1                                                   | 0 (0%)                         | 0 (0%)      | 562 (93.4%)      | 1 (0.2%) | 0 (0%)     | 2 (0.3%)         | 37 (6.1%)     |
| 382-15      | Week 2                                                   | 1223 (16.1%)                   | 173 (2.3%)  | 0 (0%)           | 0 (0%)   | 0 (0%)     | 3013 (39.8%)     | 3170 (41.8%)  |
| 382-15      | Week 8                                                   | 990 (16.8%)                    | 298 (5.1%)  | 0 (0%)           | 0 (0%)   | 2 (0%)     | 2722 (46.2%)     | 1881 (31.9%)  |
| 382-15      | Combined                                                 | 2213 (15.7%)                   | 471 (3.3%)  | 562 (4.0%)       | 1 (0%)   | 2 (0%)     | 5737 (40.8%)     | 5088 (36.2%)  |
| Combined    |                                                          | 7667 (5.4%)                    | 1761 (1.2%) | 17897<br>(12.5%) | 10 (0%)  | 828 (0.6%) | 21757<br>(15.2%) | 93054 (65.1%) |

927 **Extended Data Table 7. Counts of B cells found in S-binding clones and frequencies out of**  
 928 **respective B cell transcriptional clusters**

| Participant | Timepoint<br>(post-3 <sup>rd</sup> dose<br>unless noted) | B cell transcriptional cluster |             |             |         |          |          |               |
|-------------|----------------------------------------------------------|--------------------------------|-------------|-------------|---------|----------|----------|---------------|
|             |                                                          | GC                             | LNPC        | PB          | PB-like | ABC      | Naive    | MBC           |
| 382-01      | Post-2nd dose<br>week 26                                 | 0 (-)                          | 0 (-)       | 0 (-)       | 0 (0%)  | 1 (0.2%) | 0 (0%)   | 31 (0.2%)     |
| 382-01      | Week 1                                                   | 0 (-)                          | 0 (-)       | 484 (18.6%) | 0 (-)   | 0 (-)    | 0 (0%)   | 0 (0%)        |
| 382-01      | Week 2                                                   | 125 (10.6%)                    | 74 (27.5%)  | 0 (-)       | 0 (-)   | 0 (0%)   | 2 (0.1%) | 9 (0.2%)      |
| 382-01      | Week 8                                                   | 315 (25.7%)                    | 72 (31.9%)  | 0 (-)       | 0 (-)   | 0 (-)    | 0 (0%)   | 4 (0.1%)      |
| 382-01      | Combined                                                 | 440 (18.2%)                    | 146 (29.5%) | 484 (18.6%) | 0 (0%)  | 1 (0.2%) | 2 (0%)   | 44 (0.1%)     |
| 382-02      | Week 1                                                   | 0 (-)                          | 0 (-)       | 152 (8.4%)  | 0 (0%)  | 0 (-)    | 0 (0%)   | 0 (0%)        |
| 382-02      | Week 2                                                   | 1 (1.5%)                       | 1 (5.3%)    | 0 (-)       | 0 (-)   | 0 (-)    | 0 (0%)   | 1 (0.2%)      |
| 382-02      | Week 8                                                   | 1 (0.3%)                       | 0 (0%)      | 0 (-)       | 0 (-)   | 0 (-)    | 0 (0%)   | 4 (0.1%)      |
| 382-02      | Combined                                                 | 2 (0.5%)                       | 1 (1.4%)    | 152 (8.4%)  | 0 (0%)  | 0 (-)    | 0 (0%)   | 5 (0.1%)      |
| 382-07      | Week 1                                                   | 0 (-)                          | 0 (-)       | 192 (13.4%) | 0 (-)   | 0 (0%)   | 0 (0%)   | 0 (0%)        |
| 382-07      | Week 2                                                   | 22 (27.2%)                     | 15 (22.1%)  | 0 (-)       | 0 (-)   | 0 (0%)   | 0 (0%)   | 1 (0.1%)      |
| 382-07      | Week 8                                                   | 3 (0.7%)                       | 0 (0%)      | 0 (-)       | 0 (-)   | 0 (-)    | 0 (0%)   | 3 (0.1%)      |
| 382-07      | Combined                                                 | 25 (4.9%)                      | 15 (10.9%)  | 192 (13.4%) | 0 (-)   | 0 (0%)   | 0 (0%)   | 4 (0.1%)      |
| 382-08      | Post-2nd dose<br>week 26                                 | 0 (-)                          | 0 (-)       | 0 (-)       | 0 (0%)  | 2 (0.7%) | 0 (0%)   | 74 (0.3%)     |
| 382-08      | Week 1                                                   | 0 (-)                          | 0 (-)       | 184 (2.1%)  | 0 (0%)  | 0 (-)    | 0 (-)    | 0 (0%)        |
| 382-08      | Week 2                                                   | 35 (22.3%)                     | 8 (10.7%)   | 0 (-)       | 0 (-)   | 0 (0%)   | 0 (0%)   | 2 (0.2%)      |
| 382-08      | Week 8                                                   | 48 (29.8%)                     | 10 (17.5%)  | 0 (-)       | 0 (-)   | 0 (-)    | 0 (0%)   | 0 (0%)        |
| 382-08      | Combined                                                 | 83 (26.1%)                     | 18 (13.6%)  | 184 (2.1%)  | 0 (0%)  | 2 (0.7%) | 0 (0%)   | 76 (0.3%)     |
| 382-13      | Post-2nd dose<br>week 26                                 | 0 (-)                          | 0 (-)       | 0 (0%)      | 0 (0%)  | 0 (0%)   | 0 (0%)   | 31 (0.2%)     |
| 382-13      | Week 1                                                   | 0 (-)                          | 0 (-)       | 270 (9.9%)  | 0 (0%)  | 0 (-)    | 0 (0%)   | 0 (0%)        |
| 382-13      | Week 2                                                   | 157 (17.2%)                    | 75 (22.1%)  | 0 (-)       | 0 (-)   | 0 (-)    | 0 (0%)   | 0 (0%)        |
| 382-13      | Week 8                                                   | 192 (22%)                      | 69 (59.5%)  | 0 (-)       | 0 (-)   | 0 (-)    | 0 (0%)   | 3 (0.1%)      |
| 382-13      | Combined                                                 | 349 (19.5%)                    | 144 (31.6%) | 270 (9.9%)  | 0 (0%)  | 0 (0%)   | 0 (0%)   | 34 (0.2%)     |
| 382-15      | Week 1                                                   | 0 (-)                          | 0 (-)       | 27 (4.8%)   | 0 (0%)  | 0 (-)    | 0 (0%)   | 0 (0%)        |
| 382-15      | Week 2                                                   | 403 (33%)                      | 33 (19.1%)  | 0 (-)       | 0 (-)   | 0 (-)    | 3 (0.1%) | 1 (0%)        |
| 382-15      | Week 8                                                   | 370 (37.4%)                    | 131 (44%)   | 0 (-)       | 0 (-)   | 0 (0%)   | 2 (0.1%) | 5 (0.3%)      |
| 382-15      | Combined                                                 | 773 (34.9%)                    | 164 (34.8%) | 27 (4.8%)   | 0 (0%)  | 0 (0%)   | 5 (0.1%) | 6 (0.1%)      |
| Combined    |                                                          | 1672<br>(21.8%)                | 488 (27.7%) | 1309 (7.3%) | 0 (0%)  | 3 (0.4%) | 7 (0%)   | 169<br>(0.2%) |



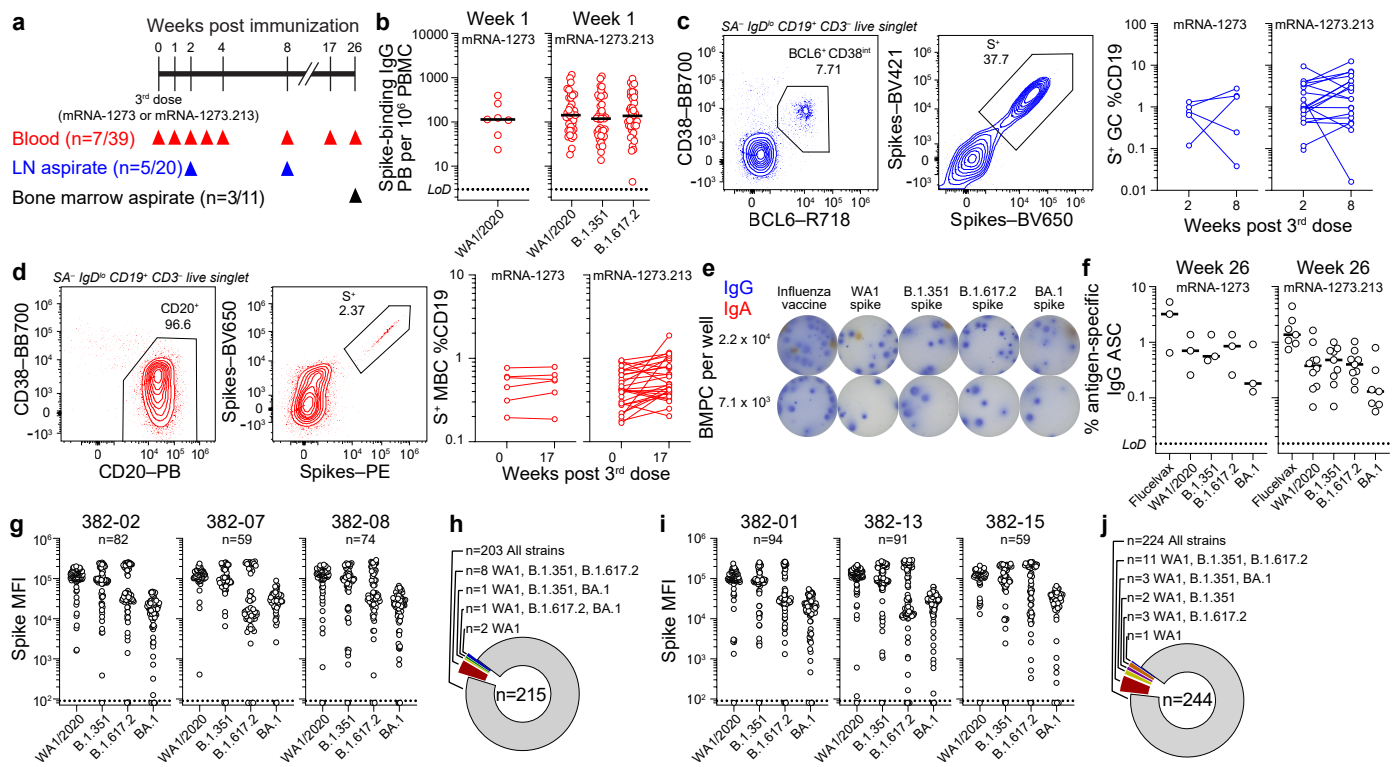

### Figure 1. B cell response to mRNA-1273 and mRNA-1273.213 booster immunizations.

(a) Study design. Seven and thirty-nine healthy adult volunteers were enrolled and received an mRNA-1273 or mRNA-1273.213 booster, respectively. Blood was collected at baseline and at 1, 2, 4, 8, 17, and 26 weeks post-booster. Fine needle aspirates (FNAs) of ipsilateral axillary lymph nodes were collected 2 and 8 weeks post-booster from 5 and 20 participants, and bone marrow aspirates were collected from 3 and 11 participants 26 weeks post-booster in the mRNA-1273 and mRNA-1273.213 cohorts, respectively. (b) Frequencies of S-binding IgG-producing plasmablasts (PB) in PBMC 1 week post-booster measured by enzyme-linked immunosorbent spot (ELISpot) in participants who received mRNA-1273 (left) and mRNA-1273.213 (right). (c) Representative flow cytometry plots of BCL6 and CD38 staining of streptavidin (SA)<sup>-</sup> IgD<sup>lo</sup> CD19<sup>+</sup> CD3<sup>-</sup> live singlet lymphocytes in FNA samples (left), pooled (WA1/2020, 1.351, 1.617.2, and 1.1.529 all on BV421 and BV650) S probe staining on BCL6<sup>+</sup>CD38<sup>int</sup> GC B cells (left center), and frequencies of S<sup>+</sup> GC B cells from FNA of draining lymph nodes from participants who received mRNA-1273 (right center) and mRNA-1273.213 (right). (d) Representative flow cytometry plots of CD20 and CD38 staining of SA<sup>-</sup> IgD<sup>lo</sup> CD19<sup>+</sup> CD3<sup>-</sup> live singlet lymphocytes in PBMC (left), pooled S probe staining on CD20<sup>+</sup>CD38<sup>lo/int</sup> B cells (left center), and frequencies of S<sup>+</sup> memory B cells (MBCs) from PBMC 17 weeks post-booster in participants who received mRNA-1273 (right center) and mRNA-1273.213 (right). (e) Representative ELISpot wells coated with the indicated antigens, and developed in blue (IgG) and red (IgA) after plating the indicated numbers of bone marrow plasma cells (BMPCs). (f) Frequencies of IgG-secreting BMPCs specific for the indicated antigens 26 weeks post-booster in participants who received mRNA-1273 (left) and mRNA-1273.213 (right). Black lines indicate medians. Symbols at each time point represent one sample. For mRNA-1273 and mRNA-1273.213 respectively, n = 7 and 38 (b), n = 5 and 20 (c), n = 6 and 28 (d), n = 3 and 10 (f). (g, i) Binding of mAbs from S<sup>+</sup> MBCs 17 weeks post-booster from participants who received mRNA-1273 (g) and mRNA-1273.213 (i) to indicated strains of SARS-CoV-2 S measured by multiplex bead binding array. (h, j) Summary of mAb cross-reactivity from participants who received mRNA-1273 (h) and mRNA-1273.213 (j).

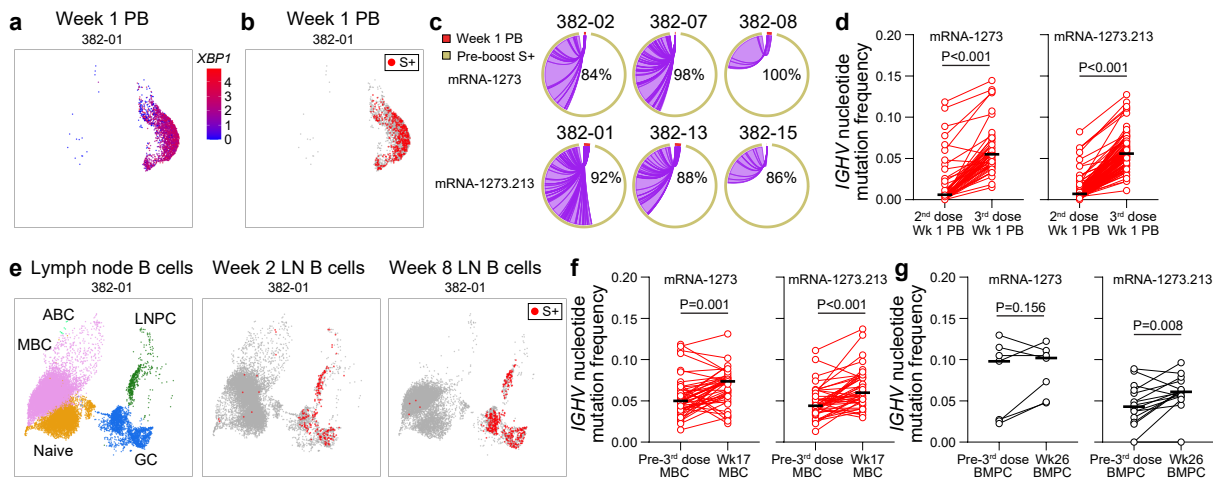

**Figure 2. Maturation of S+ MBCs and BMPCs in response to mRNA-1273 or 1273.213 booster immunizations.**

(a, b, e) Uniform manifold approximation and projection (UMAP) of scRNA-seq transcriptional clusters of B cells either from sorted circulating PBs 1 week post boost with log-normalised *XBP1* gene expression (a) and S-specific clones (b) overlaid, or from FNAs of draining lymph nodes with S-specific clones overlaid (e). Each dot represents a cell. (c) Clonal overlap and percentages of S-specific PB clones related to clones generated during the primary vaccine response among participants receiving mRNA-1273 (upper) and mRNA-1273.213 (lower). Arc length corresponds to the number of B cell receptor sequences and chord width corresponds to clone size. Purple chords correspond to overlapping clones. Percentages are of PB clones related to pre-boost S-specific clones. (d, f, g) Paired median immunoglobulin heavy chain variable region gene (*IGHV*) mutation frequencies of S-specific clones found in PB both 1 week after the 2<sup>nd</sup> dose of the primary vaccine series and boost (d), MBCs identified both 6 months after primary vaccination and 17 weeks after boost (f), and BMPCs identified both 6 and/or 9 months after primary vaccination and 6 months after boost (g). Each symbol represents the median mutation frequency of a clone; horizontal lines indicate medians. For mRNA-1273 and mRNA-1273.213 respectively, n = 52 and 104 (d), n = 44 and 41 (f), n = 7 and 16 (g). P values from two-sided Wilcoxon test.

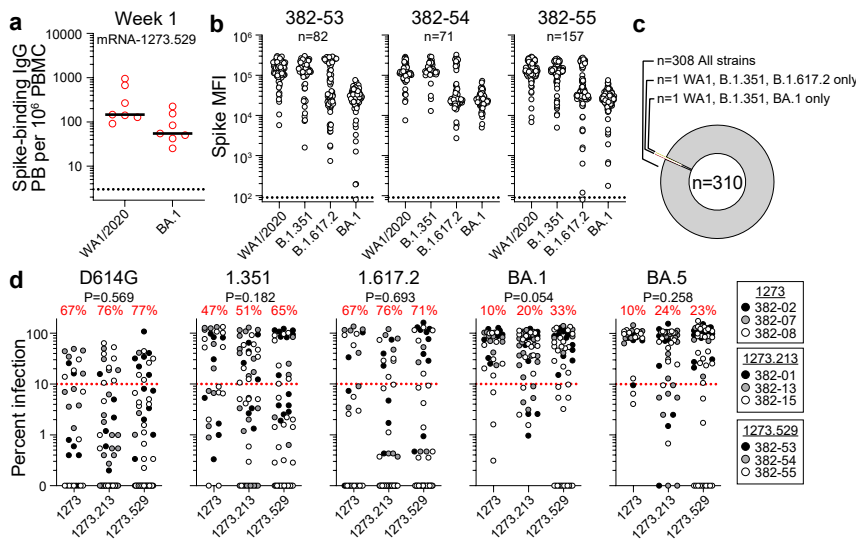

**Figure 3. Neutralization capacity of MBC-derived mAbs.**

(a) Frequencies of S-binding IgG-producing plasmablasts (PB) in PBMC 1 week post-boost measured by ELISpot in participants who received mRNA-1273.529. Horizontal lines indicate medians. Each symbol represents 1 sample,  $n = 7$ . (b) Binding of mAbs from  $S^+$  MBCs 17 weeks post-boost to indicated strains of SARS-CoV-2 S measured by multiplex bead binding array. (c) Summary of mAb cross-reactivity. (d) Neutralizing activity of mAbs from week 17  $S^+$  MBCs against indicated strains of authentic SARS-CoV-2 virus from participants who received indicated booster vaccines. Each symbol represents an individual mAb,  $n = 39$  for mRNA-1273,  $n = 49$  for mRNA-1273.213, and  $n = 52$  for mRNA-1273.529. Percentages are of mAbs below the 90% infection reduction threshold.  $P$  values from chi-squared tests between vaccine cohorts.

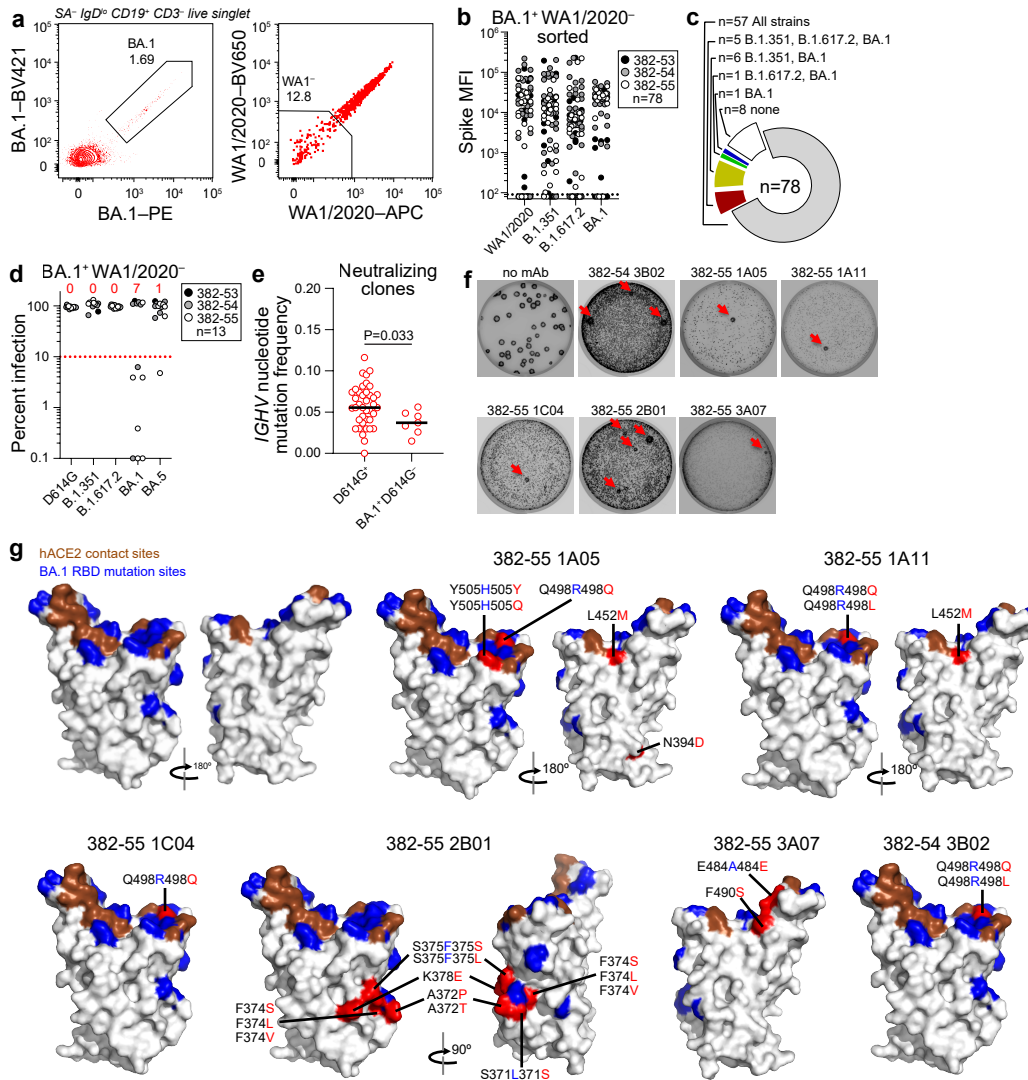

**Figure 4. Characterization of BA.1-specific mAbs.**

(a) Gating strategy for sorting BA.1<sup>+</sup> WA1/2020<sup>-</sup> MBC from 17 weeks post-boost PBMC. (b) Binding of mAbs from BA.1<sup>+</sup> WA1/2020<sup>-</sup> sorted MBCs to indicated strains of SARS-CoV-2 S measured by multiplex bead binding array. (c) Summary of mAb binding. (d) Neutralizing activity of BA.1<sup>+</sup> WA1/2020<sup>-</sup> binding mAbs against indicated strains of authentic SARS-CoV-2 virus. Numbers above each virus are of mAbs below the 90% infection reduction threshold. (e) IGHV mutation frequencies of clones related to mAbs from participants 382-54 and 382-55 that neutralized D164G (left) and BA.1 but not D164G (right). Black lines indicate medians. Each symbol represents a sequence; n = 39 for D614G<sup>+</sup> and n = 7 for BA.1<sup>+</sup> D614G<sup>-</sup>. (f) Plaque assays on Vero E6 cells with indicated mAb in the overlay to isolate escape mutants (red arrows). Images are representative of three experiments per mAb. (g) Structure of RBD with hACE2 footprint highlighted in brown, BA.1 mutations highlighted in blue, and amino acids whose substitution confers resistance to indicated mAbs in plaque assays highlighted in red.

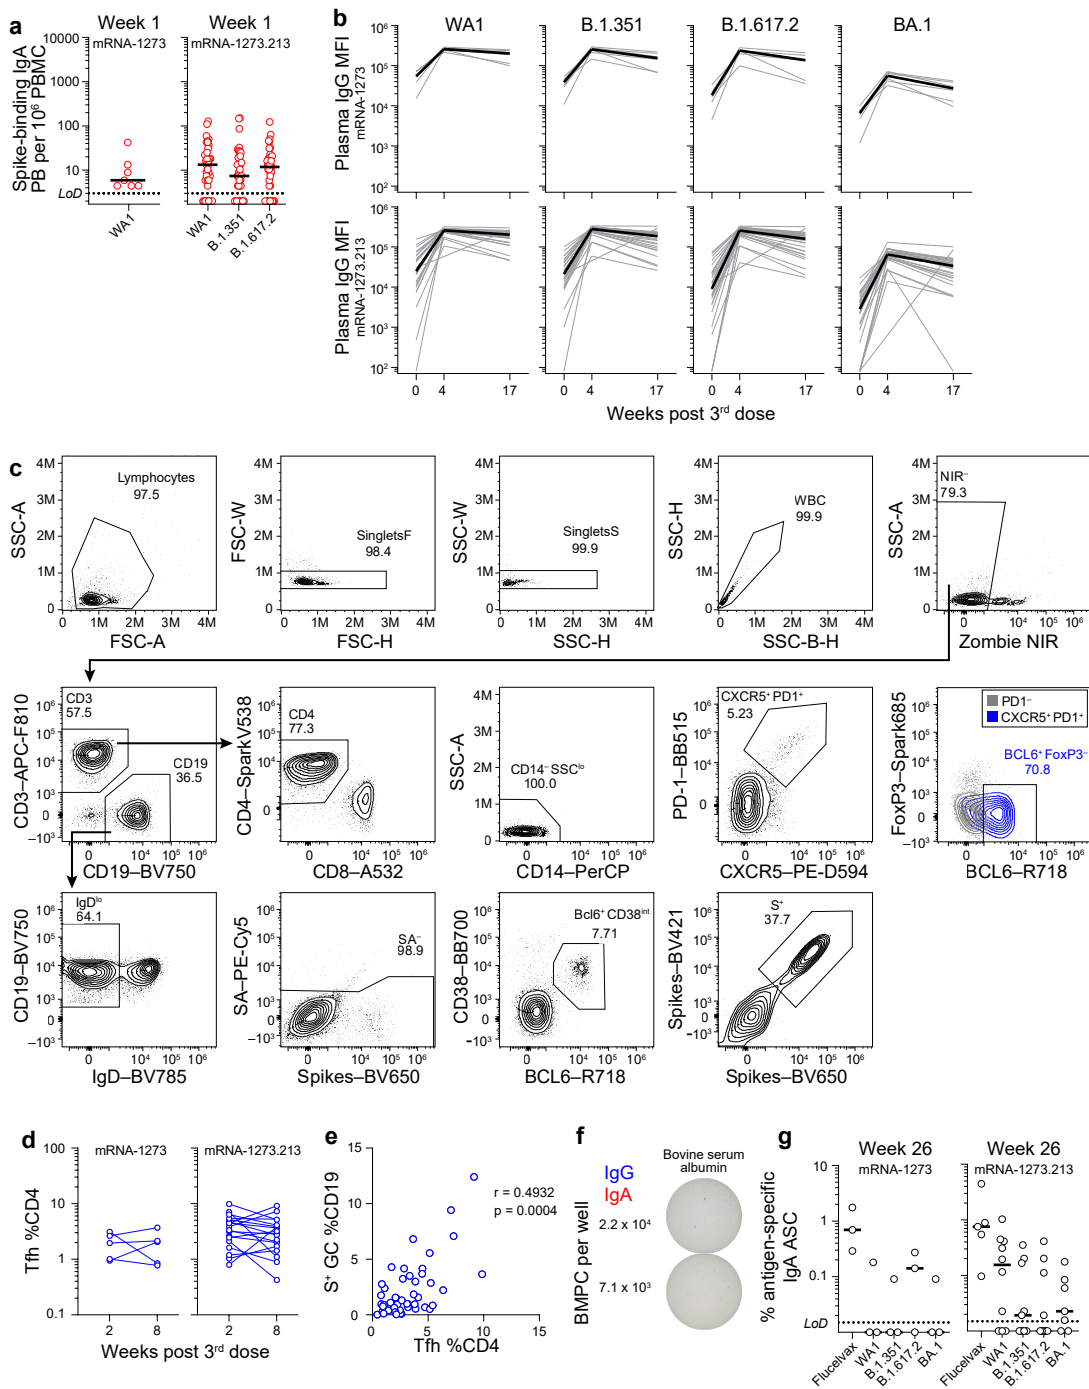

### Extended Data Figure 1. Robust GC and Tfh responses to mRNA-1273 and mRNA-1273.213 boosters.

(a) Frequencies of S-binding IgA-producing PB in PBMC 1 week post-boost measured by ELISpot in participants who received mRNA-1273 (left) and mRNA-1273.213 (right). (b) Plasma IgG binding to indicated strains of SARS-CoV-2 S measured by multiplex bead binding array in participants who received mRNA-1273 (upper) and mRNA-1273.213 (lower). (c) Gating strategy for analyzing  $S^+$  GC B cells and Tfh in FNA. (d) Frequencies of T follicular helper cells (Tfh) from FNA of draining lymph nodes. (e) Correlation between frequencies of  $S^+$  GC B cells and Tfh. (f) Representative ELISpot wells coated with BSA, and developed in blue (IgG) and red (IgA) after plating the indicated numbers of BMPCs. (g) Frequencies of IgA-secreting BMPCs specific for the indicated antigens 26 weeks post-boost. Black lines indicate medians. Symbols at each time point represent one sample. For mRNA-1273 and mRNA-1273.213 respectively,  $n = 7$  and 38 (a),  $n = 6$  and 28 (b),  $n = 5$  and 20 (d),  $n = 3$  and 10 (g).

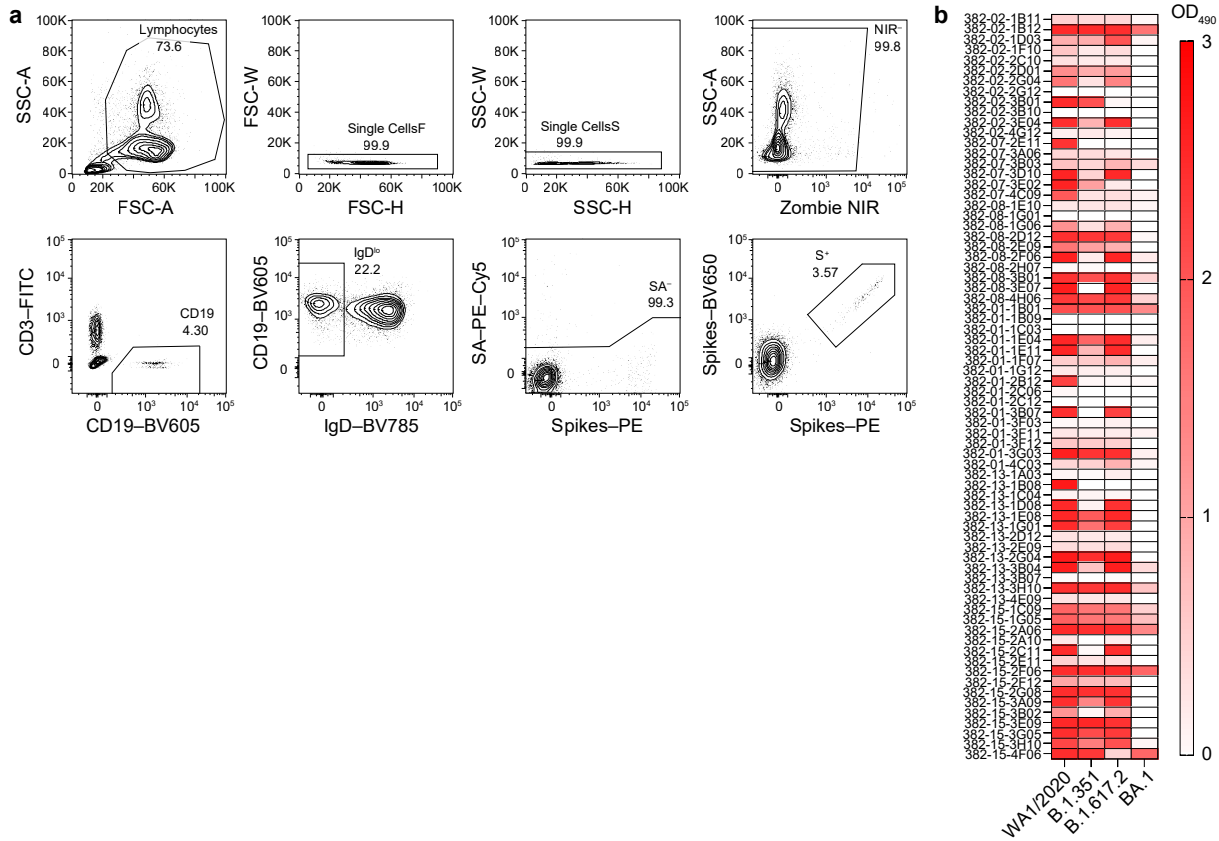

**Extended Data Figure 2. Breadth of MBC-derived mAbs after mRNA-1273 and mRNA-1273.213 boosters.**

(a) Gating strategy for sorting  $S^+$  MBC from PBMC. (b) Binding of mAbs to indicated antigens by ELISA performed in duplicate, presented as  $OD_{490}$  minus two times the background signal to BSA.

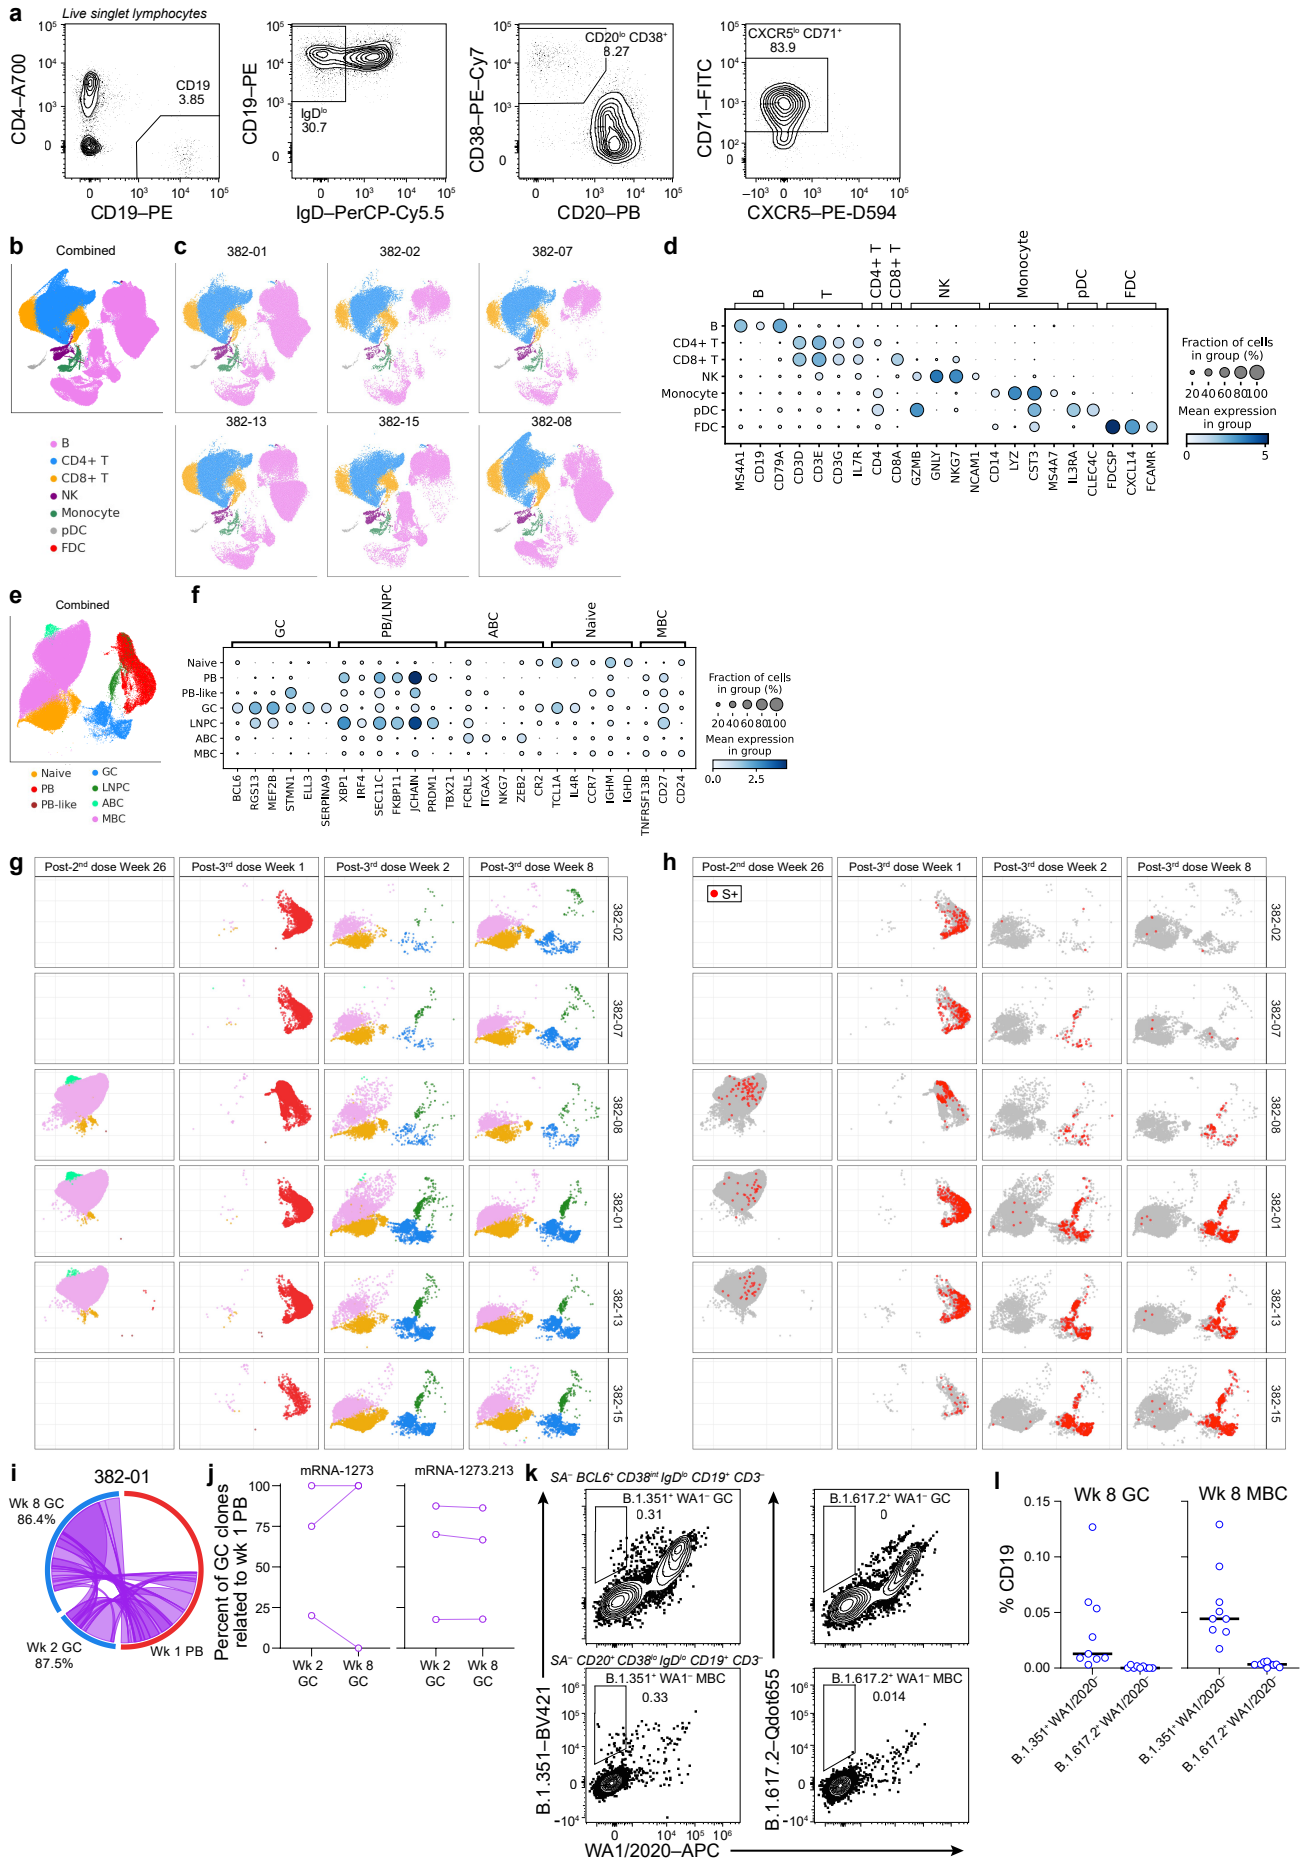

### **Extended Data Figure 3. Maturation of S+ MBCs in response to mRNA-1273 or mRNA-1273.213 booster.**

**(a)** Gating strategy for sorting PB from PBMC. **(b, c, e, g)** UMAPs showing scRNA-seq transcriptional clusters of total cells (b, c) or B cells (e, g) from all participants (b, e) or from each participant separately (c, g). **(d, f)** Dot plots for the marker genes used for identifying the annotated clusters in (b, c) (d) and in (e, g) (f). **(h)** SARS-CoV-2 S+ clones visualized in red on UMAPs of B cells from each participant separately and faceted by time point. **(i)** Clonal overlap between S-binding PBs and GC B cells at indicated time points. Arc length corresponds to the number of BCR sequences and chord width corresponds to clone size. Purple chords correspond to clones spanning both compartments. Percentages are of GC B cell clones related to PBs at each time point. **(j)** Percentages of S-specific GC clones related to week 1 PBs. Symbols at each time point represent one sample, n = 6. **(k)** Representative flow cytometry plots of WA1/2020 and B.1.351 (left) or B.1.617.2 (right) staining of SA<sup>-</sup> BCL6<sup>+</sup>CD38<sup>int</sup> IgD<sup>lo</sup> CD19<sup>+</sup> CD3<sup>-</sup> live singlet lymphocytes (top) or SA<sup>-</sup> CD20<sup>+</sup>CD38<sup>lo</sup> IgD<sup>lo</sup> CD19<sup>+</sup> CD3<sup>-</sup> live singlet lymphocytes (bottom) in FNA samples from participants who received mRNA-1273.213. **(l)** Frequencies of B.1.351<sup>+</sup> WA1/2020<sup>-</sup> and B.1.617.2<sup>+</sup> WA1/2020<sup>-</sup> GC B cells (left) and MBC (right) from FNA of draining lymph nodes from participants who received mRNA-1273.213. Black lines indicate medians. Symbols represent one sample; n = 9.



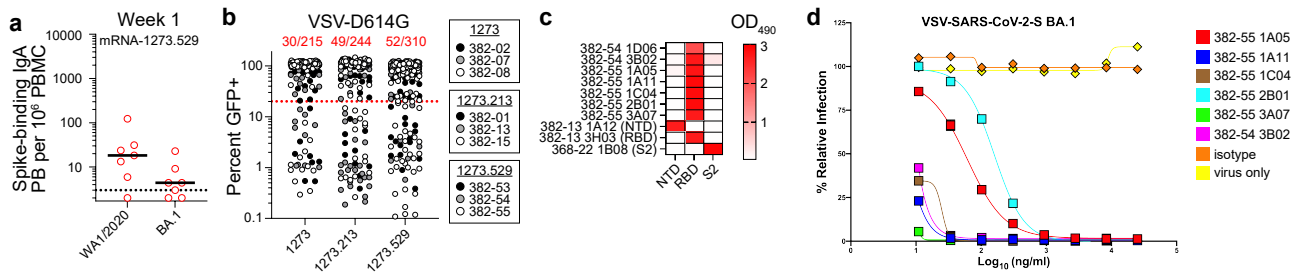

## Extended Data Figure 4. Characterization of BA.1-specific mAbs.

(a) Frequencies of S-binding IgA-producing PB in PBMC 1 week post-boost measured by ELISpot in participants who received mRNA-1273.529. Black lines indicate medians. Symbols represent one sample; n = 7. (b) Neutralizing activity of mAbs from week 17 S<sup>+</sup> MBCs against chimeric vesicular stomatitis virus in which the native envelope glycoprotein was replaced with S from WA1/2020 (with D614G mutation). (c) Binding of mAbs to BA.1 S and its constituent domains by ELISA performed in duplicate, presented as OD<sub>490</sub> values. S2-specific mAb 368-22 1B08 was described previously<sup>54</sup>. (d) Titration of mAbs to determine neutralizing concentrations against VSV-SARS-CoV-2. Data are representative of two independent experiments.
